# Supplementary material for: Involvement in surface antigen expression by a moonlighting FG-repeat nucleoporin in trypanosomes
Source: PubMed Central journal article supplement — Mol Biol Cell. 2018 May 1;29(9):1100–10. doi: 10.1091/mbc.E17-06-0430 (PMC5921576; doi:10.1091/mbc.e17-06-0430), 2018-05-01

# Supplemental Materials

*Molecular Biology of the Cell*

Holden et al.

## Supplementary data for:

### Involvement in surface antigen expression by a moonlighting FG-repeat nucleoporin in trypanosomes

Jennifer M. Holden<sup>1</sup>, Ludek Koreny<sup>1</sup>, Samson Obado<sup>2</sup>, Alexander V. Ratushny<sup>3</sup>, Wei-Ming Chen<sup>4</sup>, Jean-Mathieu Bart<sup>5</sup>, Miguel Navarro<sup>5</sup>, Brian T. Chait<sup>2</sup>, John D. Aitchison<sup>3</sup>, Michael P. Rout<sup>2</sup> and Mark C. Field<sup>1\*</sup>

#### Supplementary figure legends

**Figure S1: Locations of trypanosome nucleoporins during the cell cycle.** A broad selection of trypanosome C-terminal GFP-tagged nuclear pore complex proteins were analysed for their locations at interphase and during late mitosis. Cells were fixed and counterstained with DAPI to visualize DNA. Note the clear essentially exclusive nuclear envelope localization for TbNup98, and the repositioning to the spindle anchor site for TbNup92 in mitosis. TbNup53B displays intranuclear puncta during both interphase and mitosis. Scale bar 2µm.

**Figure S2: Comparison of the distribution of the FG-repeats (red) and coiled-coil regions (blue) among Nup53b proteins of kinetoplastid flagellates.** Panel A: The distribution of FG-repeats (red) and coiled-coil regions (blue) is shown for proteins of kinetoplastids. Predicted proteins were identified by BLAST, and where possible also by synteny. Panel B: Maximum likelihood phylogenetic tree of TbNup53b and TbNup53a homologs in eukaryotes. Iterative HMMER searches were used to identify both the human Nup58/45/yeast Nup49 and human Nup62/yeast Nsp1 as probable orthologs of TbNup53b as well as of TbNup53a, suggesting they are all members of a single family of related proteins. The phylogenetic analysis assigned TbNup53b to the human Nup58/45/yeast Nup49 clade and TbNup53a to the human Nup62/yeast Nsp1 clade. The numbers indicated by the arrow to the internode separating the two clades are the bootstrap/SH-like LRT branch support values for the monophyly between the two subgroups.

**Figure S3: Impact of TbNup53b RNAi on PCF and BSF cells.** Lower panels refer to BSF and upper to PCF throughout. (A) Quantitation of TbNup53b mRNA in uninduced versus TbNup53b knockdown cells in PCFs and BSFs. At 24h induction, ~90% and ~40% reduction in TbNup53b mRNA is observed in PCFs and BSFs respectively. (B) TbNup53b knockdown results in a gross growth defect over a seven-day period in BSFs but not PCFs. (C) At 0, 24, 48 and 72 hour time points post induction, cells were fixed and stained with DAPI to visualise DNA. This allowed categorisation of cells into distinct stages of the

cell cycle. 100 cells were recorded at each time point and the mean scores of triplicate experiments (i.e. n = 300) are shown. TbNup53 knockdown disrupts normal progression through the cell cycle in BSFs but not PCFs. An initial decrease in 2K1N cells is observed, followed by an increase in unusual cell types at 72 hours post induction.

**Figure S4: TbNup53b knockdown impacts on correct nucleolar positioning and spindle microtubule formation in BSF cells.** TbNup53b RNAi was induced in BSF cells. (A) Uninduced and induced cells were fixed and probed with anti- $\beta$  tubulin antibody (KMX) and anti-NOG-1 antibody to highlight the spindle microtubules (red) and the nucleolar protein NOG-1 (green). DAPI was used to visualise DNA (blue). Scale bar: 2 $\mu$ m. NOG-1 appeared to have an unusual distribution in induced cells. Similarly, the spindle microtubules were often undetectable using the KMX antibody in induced cells. (B) The number of nucleoli and presence of the mitotic spindle were recorded in 1K1N, 2K1N and 2K2N cells. Mean scores from triplicate experiments are shown (n=300). The number of nucleoli increased in induced interphase and mitotic cells, whilst the mitotic spindle was undetectable in induced mitotic cells.

**Figure S5: TbNup53b is not required for TSR1 distribution.** TbNup53b RNAi was induced in PCF and BSF cells. Cells were fixed and probed with anti-TSR1 antibody and imaged by widefield microscopy. The distribution of TSR1 within the nucleoplasm was indistinguishable between uninduced and induced PCF and BSF cells indicating that TSR1 does not require TbNup53b for nucleoplasmic localization.

**Figure S6: TbNup53b knockdown does not affect whole cistrons.** Genome wide RNA-seq profiles following RNAi mediated knockdown were mapped at GeneDB for genes upregulated. The vast majority of genes are observed as singletons, indicating the absence of a significant impact on an overall PTU.

**Figure S7: TbNup53b knockdown does not impact on the site of SL-RNA transcription.** SNAP-42 was genomically tagged at the C-terminus with a 12xcMyc epitope in TbNup53b RNAi cells. The localization of SNAP42::cMyc (green) was monitored in uninduced (-Tet) and induced cells (+Tet -24h, -48h, -72h) by confocal microscopy. TbNup53b knockdown did not affect the localization of SL-RNA transcription in PCF cells. For all images, DAPI was used to visualize DNA (blue).

**Figure S8: Expression of genes contained within the procyclin locus are not affected in TbNup53b knockdown BSF cells.** The relative expression of genes contained within the procyclin locus following TbNup53b knockdown in BSFs were validated by qRT-PCR. The steady state of individual mRNAs was not altered following TbNup53b knockdown at 48h post induction. Expression levels were normalised to  $\beta$ -tubulin.

**Figure S9: RNAseq profiles for selected loci demonstrate specific impact on the procyclin locus of Chr X.** RNAseq read counts are shown mapped to the 427 genome, with control profiles at top in light blue and 12 and 48 hours post induction as middle and lower profiles (dark blue). Positions of ORFs are shown beneath each system, with the conventional top strand in blue and the lower strand in red. GeneDB accession numbers are also indicated.

**Figure S10: Changes in the procyclin protein levels upon TbNup53b RNAi.**  $1 \times 10^7$  cells were extracted by 2% CHAPS (90s 100°C, 15min 12000g) prior to SDS-PAGE. Procyclins were detected by monoclonal anti-EP antibody (Cedarlane) or anti-GPEET antibody and the signal intensities were measured using ImageJ. Right: relative change in expression following 48h TbNup53b knockdown compared to uninduced cells (dashed line). The standard deviations were calculated from three independent experiments. The relative intensity of the entire Coomassie stained lanes were used to normalize the procyclin signals.

**Figure S11: RNAseq map.** Combined datasets for 0, 12 and 48 hour RNAi and singefungin-treated cells mapped to the *T. brucei* 427 genome, and corresponding to the data summarized in Table S2. Full dataset available to view or download at doi: 10.6084/m9.figshare.5017019.

**Table S1: Sequences and accession numbers of proteins used for phylogenetic reconstruction of the ScNup49 and ScNsp1 families.**

**Table S2: Protein identifications for TSR1 affinity isolation.** The top 25 hits were considered and colored as bold; affinity handle, green; GFP, red; possible splicing/mRNA processing factor, gray; likely contaminants, light gray; Obado keratin, black; others.

**Table S3: RNAseq raw data.** Sheared cDNA synthesised from RNA extracted from TbNup53b uninduced and induced (12h, 48h post-induction) cells were sequenced by 76bp paired end Illumina sequencing. Reads were mapped to the *T. brucei* 427 strain reference genome and aligned to annotated transcripts. The FPKM's of annotated transcripts is normalised by quantile normalisation and the statistical significance for transcript level changes is calculated based on  $(\text{FPKM}_{\text{treat}}/\text{FPKM}_{\text{parental}})$  values against null distribution using *t*-test. In the filter column, '1' denotes a significant gene with  $p < 0.05$  and *vice-versa*.

**Table S1. Protein sequences used in this study.**

| Species                            | Group              | Source                    | Sequence                                                                                                                                                                                                                                                                                                                                                                                                                                                                                                                                                                                                                                                                                    |
|------------------------------------|--------------------|---------------------------|---------------------------------------------------------------------------------------------------------------------------------------------------------------------------------------------------------------------------------------------------------------------------------------------------------------------------------------------------------------------------------------------------------------------------------------------------------------------------------------------------------------------------------------------------------------------------------------------------------------------------------------------------------------------------------------------|
| TbNup53b / ScNup49 / HsNup58/45:   |                    |                           |                                                                                                                                                                                                                                                                                                                                                                                                                                                                                                                                                                                                                                                                                             |
| Trypano-<br>soma<br>brucei         | Kineto-<br>plastea | NCBI <br>XP_843946        | MMSTAPTGGFGGFAAAKGGFGAVTATGGTGFATAATGSTGNFGGGFGTATGSGF<br>AAVTTTGGTGGFGAGKGGFTTATPAQPHLPQYKGIKGGSSTEWLHGVLNLSILRD<br>DVVFEDLPVPLQQHLDTFHNFQAEHDAKQVVEAFLDTSATPNATPAPSYRELKVKM<br>NQLASGENAVDGIKVECFEREVAHRLGQTLDKCEDDILDMKNVWVPLSEIDFTQ<br>RAGGNRPKPAEPFQRILREIQGMDAISAAVSELEAAVPCGRRVRGPVDDASR<br>SNAAPEPPCASASEFLTKLGGVLPDPVPPGLGSAASAHVSRINASLSNQLTLL<br>NLAAWTLRLHTRADSARDLVHNYGTSEAEALLAQHQQAESSAGPRRPFLLPSSST<br>GAAAAEVNQDVTGDIHRRSAFPHRSKALSNGERKMQYDVLLEKRYQTAAAPAAPLS<br>TATASGTASSVAGATLGATSSSTIATGFGAPQSLGTGGATIFGAGTSAADPRKTLN<br>KTGRS                                                                                                                                        |
| Trypano-<br>soma<br>congolense     | Kineto-<br>plastea | NCBI <br>CCC89792         | MSANVPVPGSADNRGASLGFATPTAGMSGGFGGLVGMKTGFGVNASSTFGG<br>ISINKGFGVPSAQPIPPYKGIKGGFSTDWLQKVNVSRLDDVFLGDLPPPLQQHL<br>LMEIHNFIQAEHEAKQAVEAFLDSTTRSIAGDAGYRKLVTQLSQTGGENAVDAIRD<br>CFEREVQSHKLSRAMDRCEEIDHNYMKQVWVTPSLGDLFTLPISSGRPRPSEPFQR<br>ALRETECEMKGLSTTIAELKASVVPGGHCQRGIVVDDKNINNSVADPSSSSAAVS<br>RLTSGLOPPHVLALGLGVSAPVIRISSLNELTALLNLAARTLWLHTRADNARDIF<br>VHRYGAPAEALIFAQRQEESSDTPRRPFALSSTAATSADVQKDTIGDIHRRSACSH<br>HSEALSDVGFMRQYDVLLEKRYQTAAAPAAPLS<br>VPMGFAQTSSLGTEAGARFGGRSSTTSASKRTLNTGYRS                                                                                                                                                                                     |
| Trypano-<br>soma<br>cruzi          | Kineto-<br>plastea | NCBI <br>XP_810452        | MFKPQQASAGTGFAAAPATAGKSASSGFGGFGANTVTTGGFGGNSTVFGSFGGA<br>AKGFGTAAAIQGAQVPPYKGIKGGFSTDWARSVNFSTRDDVFEELPPPLQQHL<br>LMEIHNFIQAEHDAKRFVESFLDSTTRSIAGDAGYRKLVTQLSQTGGENAVDAIRD<br>VDCFEREVQGHQGLMLLENCEEDVVQYKHWWEPLAEQDFTQRLGGNRAELPSEP<br>FQCCLREVQTRMEEMSAVLTELELAVLPNAQRQKRTTNDKNTSNTTTEPSSS<br>SRYTAEMKPLDGTALRPTIASHPVQMNNTLSNELATLLNLAAWTSLRLHARADAAR<br>DLFVHLYGSEAEVLLAQQQWQMPVGPKRPFPLRSAEASSFSEPNHDTIGDIHRRS<br>VGLDRLGALSNGERRMQYDVLLEKRYQTAAAPAAPLS<br>SAVPTLAGTTAGTTTTASTAAAGFGASAPPATGTGGTTFAGAPLGTASSTRANKK<br>GRV                                                                                                                                                             |
| Trypano-<br>soma<br>vivax          | Kineto-<br>plastea | NCBI <br>CCC47107         | MMFGSSQPAFSSAPGTNAGVATGATPFFGAVPPGVVAGAGTSFSGFANKGFGIT<br>ATPDGQQPIPPYKGIKGGFSAEWPRVNLSTIRDDVFEELPPPLQHHLIHNHFVQ<br>AEHTAKQFVKSFLADSVGPEPGAASYSRSLSKNLCLRLNGKNAVDIRVDCFERES<br>QSNRLGHILDKCEEEVHNYIKHWEPMESEDFTRRTPSGSESEPFSSALCEIQTY<br>MKEVSSIVSELEAALLPDGRRRVPVGTNDGKANAVLEQSRALPHLSRFHVASEP<br>CEASAGSGSPAITNPAQVNSLNNELTALLNLAWTWTLQHSRAEDARDLVHMYG<br>ASEAELFSQNOQRNPAIGPKRPFALPLRSKAATKEDGHTIGDIHRRSIGLDRARVS<br>SGERKMQYDVLDRQRHVPLVGPAPTAPAGLNIPVASTAPAVTVGAAPTNTTAPA<br>LLGSTAPPSSRTGTGEFSRHVGGKGRQ                                                                                                                                                                               |
| Trypano-<br>soma<br>rangeli        | Kineto-<br>plastea | NCBI <br>ESL12123         | MFGLGQTSAGTGATAPATAAGKSAFSSVGTGATAAAPPFGGFSFGTNTTATGGF<br>GTSTVGGFSSASKGFGTATAIGAQPVPYKGIKGGFSDWRSVNFSTRDDVFEELPP<br>LQHLIHNFIQAEHDAKRFVESFLDSTTRSIAGDAGYRKLVTQLSQTGGENAVDAIRD<br>LFEELPPPLQQHLMELHNFQTEHEARLVEFLADSVGAAAVVSSYRELQKLAQDL<br>TTGENAVDAIRDVDCFEREVQGHQGLMLLENCEEDVVQYKHWWEPLAEQDFTQRL<br>GGNRLTEPSEPQRCLRDVQMRMEEVSAALMELELAILPSAQRQKRLTAADTNNTS<br>NTTTELASASPFSSRYMAEMKPLDRASGLRPTMVTPIAQMNTLSNELAALLNLA<br>WTSRLHTRSDAARDLFAHLYGASEAEVLLAQEQRQLVGPKRPFPLGSAETSIFSE<br>RDQYTIIGDIHRRSVGLDRLGALSSGDRMQYDVLLEKRYQTAAAPAAPLS<br>SGSPATGFARTANKKGRS                                                                                                                             |
| Leishmania<br>braziliensis         | Kineto-<br>plastea | NCBI <br>XP_001566<br>428 | MSLGGFGTGANAGGFGAKPAMATGFAATPSTGAGTGTGPGVNGHRFGGFGTSA<br>AAAGGFGAPLAPGGFGAPAATGFGAKPGFGTAPATGGFGAGGGFGIATGGTG<br>FGGSTATSSLGVRGGGFGMAGGFGSTTAPAAPTAQQPYQGIKGGNATSWAR<br>DIDFQVTEQVRFALPQPLQQLHMLRSMFMAERDAAKVYLYFNESDDADSAAG<br>AIATSATGSSSPTASSSSYRQLLAQMAALKGGGNRAVDLVAHVCNQHEGQTRRL<br>QRLEKLEANIRDYERHVVPELLEQGLPSSLAGSGMNAACGGAYRPAVNSGAAAPV<br>ALVEELSHRMDHVSSALTELEATLVPPGRSLRGAGVGGCRGHNGRAISNDIAQIN<br>AALYELNQLRDSSVAHLHSRTDIARELFTQYQGAADVLFADTEQQRNGMTL<br>FRRASPSTYFDIPPLPQQSQSPAASAATTTMGITAPATGFGAGTTSALGGGIGATS<br>GGGAFGAAPAAGAAGAAATGGFSAPATAAAAAGGGVGGFGGATAPATGFGA<br>AAGGTSTPAAGLATAVGGFGAAPTAGGFGAALASATAAPATGAPPFAPSLGPA<br>PGSAPTAVNLGGGAAATGFGMAPGKSGIGGGDDRRPRRAR |
| Phytomo-<br>nas sp.<br>isolate EM1 | Kineto-<br>plastea | NCBI <br>CCW59601         | MSFTFAAAPAASNQAGAQNPKNMLGFSIPAASTTTPMANTGFGTFNTGFMKPG<br>GTFTSGTGISNTATGVNSAGGFPSTTGFSSITTFNNSLNTLTPQLPPYKGIKGP<br>GYAKTWQNTVDFSQINDYTLFDSLPTLQQLHMLELYAFSSKEEESVRAVTDYLNLIK<br>PIHTGKTANSKMDTNSGSYRHRQSRQLAELKGGSHAVPIVAVSCENHEKEAQFSQ<br>HLDQFESIIREYQHRVWEPLLASGNLTRAKNNNSTNNSLGSMSNFHDHVNNAKSP<br>SIVELEQIMRTLSGQIEELKMNVMPSLTPNHLVNAADSAAKQDRSLCNYASNVYLS<br>VDGRTPLRYRNTSLNYSNRCDRLQFCPSTFSPLGTTVTTGFSGSALEGDPTQSEVI<br>PQINASLSLFTSLMNLSSWAGHLHKRTDTARGIFTRQYQYEAADVLFKPPIRSQET<br>PTLVPLSAPVLPAAANPVAAPAAFTTQMANFVMMNTATNTLQTAPAAATPVGGFGSG<br>QGLVSGFGGWKTPVVR                                                                                                                     |
| Crithidia<br>fasciculata           | Kineto-<br>plastea | NCBI <br>AODS0100<br>0155 | MSFGGFGAKPATAAATGFGAAPTGGGFGSPAGGGFGSAGGGFGAAAAAATA<br>TTGFGAPATAPATAGGGFGASAAGGGFGAKPATAAAPGFGAPTGGGGGFGSSATG<br>FGGGTSSGGFGAAPTTFGAPAGGSSGLGATMTGGFGAGRGGFGVASTGTSFG<br>GGMGAAAPAAANAAPTAQYYPYKGIKGGPNSMSWAREVDFSQVTEQTPFESLPOPL<br>QQHILIELRSMFMAERDARTKVVYELNESDRSTSTQTSAAAAKAGADAAATSVYRGL<br>LSKLADLKGSGNCAVDLVAHVCNQHEGQARRQLQRIERLEASVRDYERHVVPEL<br>ERGLPQSTNGGSTSGLRGMYPSSASSDAAPFVALVEELSRRLDSVSEELGLEA<br>TLVPPGRPLRGVSGERAGHRGSSAVPSDAIAQINASLLYELNQLRDFSCVAHLL<br>SRDTARELFTQYQGAADVLFADTEAQRSGMALFRRASPSTYFDIPPLPQSLSAPT<br>VAAAAAPAGGGFGAPAAPTATGGFGAGAGTGGGFGGFKPATAPAAAAATGFG<br>AKPSTATTTTATAAPAGGGFGGAAAPATAPGTASATPAAAPATMGFGAGPASGA                                   |

|                           |               |                           |                                                                                                                                                                                                                                                                                                                                                                                                                                                                                                                                                                                                                                                                                                                |
|---------------------------|---------------|---------------------------|----------------------------------------------------------------------------------------------------------------------------------------------------------------------------------------------------------------------------------------------------------------------------------------------------------------------------------------------------------------------------------------------------------------------------------------------------------------------------------------------------------------------------------------------------------------------------------------------------------------------------------------------------------------------------------------------------------------|
|                           |               |                           | AGAAPAPAATGFGGGFAGPAGGATAPAAAAAPAMPASPAGAPTSFSLGTAATG<br>TGGFGAGLGTAAEGDDRRPMPRRPR                                                                                                                                                                                                                                                                                                                                                                                                                                                                                                                                                                                                                             |
| Herpetomonas muscarum     | Kinetoplastea | NCBI <br>AUXJ01003<br>408 | MSFGFGAAKPPATGGFGAAAAAATGFGATAAATGFGATAAATGFGATAAATGFGAAAA<br>PAATGFGATAAATGFGAAAKPATTGFGAATGGFGAASGGGGGAAAKPMGGFGA<br>ATGGFGASAQPPQALPAAQYPTVKGPGNATSWQSVDQSINNTAFESLP<br>PPLQQHLLERFSMHAEEKAATRAITAYLNEFSTEKTYRALSKRLTTMNSGRNAVDA<br>VGVRCRRRREVDGFAKSLDQLEGNIREYRQRVWEPIAEGDGHRRHDTGTPSPSS<br>SPSAQQPLVTLVEGLQQMERIARQLQLEMDLLPSGSGSGLDGGLOVANRSL<br>LASPLHSRGMTAGVRPLASSPVAGSEAAAGDIAAQINVLGNELAVLNTSMWAARL<br>HSRAEAARGLFARNYGDAGALFAPARAAGVAGAKNIFALPRLPAAAAAPAPAAPT<br>AAAGFGAATTGFGAAATTTGFGVKTAATTGIGAAAAAATGFGAAAAAATGFG<br>GAAAAAATGFGAAATTAAPASTTGFGAAAAAATGFGAVAPAAAPAGPAA<br>APAPAAGGVAAGFSLGPGSPRFQPATPAAGGDSARPETRRKR                                                                          |
| Strigomonas galati        | Kinetoplastea | NCBI <br>AUXN01000<br>936 | MVLLVTFGAAPAGGGFGAAAPAAQGGFGAKAPGGFGGAAPAGGFGAAPAGA<br>PAPQGGFGAAPAAQGGFGAKAPAGGGFGGAPAAAPAGGGFGAAPAGGGFGA<br>APAQGGFGAKAPGGFGAAPAPGGFGAAPAGGGFGGQGGGGFQQSTGLLRGFG<br>SGGGVWAGLTNGQSYASGNPKPTVTAQFPYPLKGPYDMMWVTRVDFAAALTT<br>GTYLESPLAELRQHLLDVFDFQRKEAESQAIHRRLRKSGSFTDPPLSFLQNTGPR<br>SAKRVVAACHRRRESDAQQLVEEINSFEREVRDYQNVWAPLDDHALDTPAGPVAP<br>VLASNRTRTRTALLDMLSKAQSELEQDVFQLEQVQTRGAPGTATSVCEASDAIL<br>QCLSRDLSACRRAAKSNAEASMRGAYTQKFGAERANRIFVNEEKDTPITVLRRLP<br>VPSAGFVPPAGGGFGALGGGFAAPAAAGGGFGAKAPAGGGFGAAPAGGGFGA<br>AAPAGGGFGAKAPGGFGAAPAGGGFGAAPAAAPAGGGFGAKAPAGGGFGAAPAG<br>GFGAAPAGGGFGAAPAAQGGFGKAPAGGGFGAAPAAAPAGGGFGAAPAGGGFG<br>GFGAAPAGGGFGVKAAPAAAGPPSFLNLAGK                            |
| Angomonas deanei          | Kinetoplastea | NCBI <br>AUXM0100<br>0122 | MSFGGAAPAGGGFGKAPATGGFGAAPNAAPAGGGFGAAPAGGGFGKGPATGGF<br>GAAPNAAPATGGFGAAPAGGGFGKAPAGGGFGAAPNAAPATGGFGAAPATGGFG<br>KAPATGGFGAAPATGGFGGAPATGGFGAAPATGGFGKGPATGGFGAPLATGGGLGA<br>APGSAQTEVKYTGATGPGYRATWDSQSELSQFSHTNPNFENLPPMRLHISDFQ<br>KAEAAAAEYKDYFADFNDSEKSNYRTLMMHKMDKLRGGTSLPTLKAHTTELKNNM<br>ATSVNAGSAGTLEREVSHFVKDYKSGSISNSTEPNLVSYFAREVDKIAENIDRLDVA<br>NELENNHVKGSGSLLANTENRDINALLNHLITVVSQYADRTSHLQRAAEVQLAIFIR<br>FGEAELAYLSTNQPPRYPFDSIALRPLPALPQATPTGGPAVGGFGQATGTTGGFG<br>AAPTGGFGATTGGFGAAPTGGFGKAPATGGFGAAPTGGFGAAPTGGFGAAPTGGFG<br>PATGGFGAAPTGGFGAAPTGGFGKAPATGGFGAAPTGGFGAAPTGGFGAAPTGGFG<br>KAPATGGFGNAAPFSLNK                                                                             |
| Trypanoplasma borreli     | Kinetoplastea | non-public                | GFGAPAASGFGAPQQLQTTGHITAAQIAEAERKAGELGPGYCCRTKPHWSLNLDLT<br>SLYDDAPFETLPQPLQQLFLAEIHFQKQRKELTELNMLVSELESTPSCSSLSGIKK<br>GYRAITATPSTTNSNGNSRSLAFLOKRLNQMTRGSGKLESLENLVECREWGRTRS<br>RFSHISALHNSLNRYEREVWESIRMRGADYWKSGRNHAEGPSKYFEEVLRIGCC<br>MESIDASLREIEAAVMPTSNRQDVCGMHPNESEVSNVNGAILPRELPNVTFGNG<br>YAMNSPVVNAARFFGSMTTMLGQCTSQQPVSHPPHWSNPFDLNLYLFGVPSQDQ<br>PNSVRLHNRDKSMPSETTHYVEDNRRRYTNNNPNPSYINTSSMGPISRGTSRM<br>SDGSQVGLFVGGVASSQNGQRDQVSVYPGCVTVTQDTPDQVPAMHNEALAIQ<br>LASRVASSHANANEVRELFAREYGAATEHRVLSLSTGRNTIADLRKQGYTYY<br>DFEDRHRSSFNQSIDGVAYEYNSLGSVAVGGKSLTSLTSSMPDNNLQFRDISNIS<br>NINNNKIMHYDPIARKHAMKVVATGPTSTIPTTGFSAVPTTITIVSAPTTISAVDVAK<br>TTSAPTFGATPAPICAPVAPVPSVGGFGIDFEGGAGHGKRMDR |
| Bodo saltans              | Kinetoplastea | GeneDB <br>BS64090        | MFGKTPAPAGFGAPAAAPAGGGFGKAPAGGGFGATAPPAGGGFGAAPAGGGFGKAPA<br>AGGGFGAPAAAGGGFGAPAAAGGGFGAAPAGGGFGKAPAGGGFGAAPAAAGGGFGA<br>PQAAAGGGFGAAPAGGGFGKAPVAGGGFGAAPAGGGFGAAPAGGGFGAAPAGGGFGA<br>GAPAPQQLVFTGTPGTYAPNTPSVVTTGDLTQITDDTLVSKLPQNLQTHLQGLLE<br>FGAKERHARTEIQHAYQQLQSESNKKLRLALQDRDLNLTTPKPSLGDVLDLQVAYH<br>RDKAAKQLLQRAKDEDDISNYSRVDWDRHIREGTEYWQQKLNIREGSELLRNLML<br>ENTAQVMAQVDDVINTLAAALAPLQRHNGRRTAATTDGQRPATPLAPPPTSRLQL<br>QSQSAVNLYGAGGAANGSSPNAPISNGHQLDFNPNPIASAPADPIELVQESLQQT<br>MNAFLNLGDNVSLHRSRANQVRDHYVRYGETEAEDEVFSKDKSLGGGASDDVDAN<br>DNEADEFVTITIGDLKGRVRNNEIGGGYRVSKALGGGGSARSLIPGIMTRHSMR<br>YDPTLEQGVGNVAAVAGAAAPAGGGFYCFV                                                              |
| Saccharomyces cerevisiae  | Fungi         | tr G2WDT3                 | MDISGVSRFAFTPKPSKRRVAVDLNAAQVSTRELERORLEDLNLHLSRYSRIVRA<br>LETQVTLETHIESFASVKAPKNDVLETLRAQLEQAKAELDDASQRYADLQLEHNS<br>LOEDFKRAEGDIQGLTSLKERLOGRIESLQAMVNRLEGGQLSAQSSLQEEKEDGDL<br>ARQQLKDLKADLVKHRGRADSEAKARVALENEISGLQESFRLKELEHQSETDALQQ<br>QLQVALSQVVSVKTTGNQYEEEMSRLLRVAKSSYAEAADAFREKLKYYQMNPPT<br>SAAPSMMDPELKRQAENEALNRNVAARDQDADLKNEARHAEDKIDRLTHDLAS<br>TKAENKAHLANKDMEIKNLQQRISGLEDDYRVLDRNLSDAEIDQYRGLLGEYKR<br>LNMHDQSLDAMDQLVGSPLSAQRDEQAEQDLDMSVELRHMTVEEVEAWTQMS<br>SNGQIQSVDLDRGFDLHLQNIQGEPIFDDCVLTVDNGRVSETLVMPHGHVAVG<br>QVVRVVSGLGEQSHRPGDIAWTSFRDFEEDNTINVLQERGSQVICRAEYTCEDSTG<br>ATRCCMM                                                                                                |
| Schizosaccharomyces pombe | Fungi         | sp Q09793                 | MFLNKTSPFGSTGTQNTGTSAGTGLFSSNTFGNNTQANTPASTGGFGVTTGGA<br>FGQTKPQTGGSLFGNKPATSTTGLNLFQNPQAAPGGSLFGASTTKPQAPGGL<br>FNQNTQAQPAQAAPTGGFLGSLGQNTQSQQTQPAQANTSLFGQSNIGTTGGLFD<br>QNRNPTSTFGFSTQPSAGLFGQSTQPSGSGTGFGLSNNTQTPFFSAAQQPST<br>TQLPSNPAINATTRYSSLNANTQKFLDDLKDFEFSQIQLAEELQTKLGTVSELVESVPN<br>DVAEVQRRLSSVSTALLIDSDEIETKRVVDEDTSNARISSRILDVFKTPGATYFASN<br>DPLMNYEQFTENAKKRTDYAATIGELEQHLEQVETTPQNNSPALLKTIKEEHKLF<br>MALSNRFAQVHDEVKRLQVNTSTSLPFIS                                                                                                                                                                                                                                                        |
| Aspergillus flavus        | Fungi         | tr B8N834                 | MFSGLGGQNTGTTGGGLFGNSTATTSQPSGGFLSFGTANANTAQSGTTGGGLFG<br>GASTAQTSKPLFGGSGTNNNTGGSLFGGANQNNNTQQQQAQKPTLSLFGNQNT<br>TTQQAQPTAAAGTVVPGVKVDLNNLPTTKYESCADEIKKELEVDNYYLTKQMK<br>NEVGNMIPSIQAQGETIPNDVEFVQKLETMQHALENDASDIDLRLSLVARDAAEQ<br>VGFRAIDTLKLPLOFQPAAGSGWWSVQDQKLSDRQSLRSTRKNTLALPDDVEGDS<br>STTVNGVPVNLVDYFSQRSDEMGTVLERYKQNLKEIEDHLHGVEATLERQIHFVTS<br>RSRDGAAAGTPKSVLNDLAVLGDVEAGILGVAASRLGGVTEQVQEVVLGPPSLGEG<br>RLNL                                                                                                                                                                                                                                                                                 |

|                          |         |               |                                                                                                                                                                                                                                                                                                                                                                                                                                                                                                                                                                                                                                           |
|--------------------------|---------|---------------|-------------------------------------------------------------------------------------------------------------------------------------------------------------------------------------------------------------------------------------------------------------------------------------------------------------------------------------------------------------------------------------------------------------------------------------------------------------------------------------------------------------------------------------------------------------------------------------------------------------------------------------------|
| Tuber melano-sporum      | Fungi   | tr D5GCV8     | MSLFGFRINTPTSGTSLFSGGQQQQPQTLFSGSTTTTSSGSSGGLGGASQPAAPA<br>PGGLFGGGQAQAQTPAIGTGCISGGGAATPATSGGGGGGGGGLFGGALTPAATPA<br>PASGGLFGTPTSTTTTPTGVAPTGGFLGGATAAATSAQAPAGGLFAGTAASASAPAT<br>GGGLFGGGTSQPPPKPLFTGSAATTSGTGAFGSTATPRPGGLFGGTTPTTTPQ<br>QQSQQQQNTVPAATIDASKLIPTRFRGDCHAEVQRILEGIEQIEQIRIATLTAHFF<br>GHRATIDSIPSDTAVLTHKLAATKSFLLAADDALSTARQHNEDDAATLSIRNVDLF<br>RVLPAQRSQYIAQQHNQPMRENDITSNKPMINYFDTQIAKMDQKLDLFLVESVQVEVL<br>SLRSVEEQATMGSGGENLTALTGGVGGRRQDARRLNRLREFNDALDKDVSGRIVDS<br>KDGIRALRSRR                                                                                                                                 |
| Dactylellina haptotyla   | Fungi   | tr S8AK90     | MSLFNRVSNTPSAINTSAANTFGTASGAATGGIGGTAAPSLFGQSTASQAPASAGL<br>FGGAPAAAPSGGLFGATANTTATNAPTAGGLFGGAAQTAAPAAGGLFGAAPSITSA<br>GAGTFGAAAAATPSAPAAAGLFGAGQATAQAPAPSGFFGGGPAMQPGATQTTGAAG<br>GGLFGGSTAGGSLFASQAQRPAQSGMFPQPPAQPPNMFQSQQAQAPQAVEM<br>NFSNMRGTTRYEELHADVRNLLDFDDYIQKAIQISQELASRTVGHKETMESVDGDV<br>EHVSRKLGFTTFLNNDGHSIGQLHNASSQLINTAALSTRITDILRLPISQRSQYLSH<br>HTSNPEYSLIPYFEEKAGEKGTQNFVLAADVDEVEKLEAVERDVGQVNMMSAESKVK<br>EVVKAERVVFSGLMAVASKVASVNEEDLVLR                                                                                                                                                                          |
| Crypto-coccus neoformans | Fungi   | tr Q5KP67     | MSFGGFKFGNSSTTAPATGSAPTSSPFSFGNTSTNSAQPAAGASNTGGGMFGGF<br>GQNNQQQQPPAGGGSSLFSGFAGKPAAPAAAGTTGTGGGLFGGASGQQQPPS<br>GGGLFGSTTTPQQQAQQSGSLFGSTTTPQQQQQQTGGFLFGSTMPAQMGSSG<br>LFGSTVQKPAAGSLFGSTTQPTQQSTIGLFGSTAQTAQAPASTGLFSTTQQQQ<br>STSLFGQSTAQLGGSSLFQTTQPPQNNQQLKTSANPGANTGADKTKTFSDLPEA<br>AQKYIEQLDTAIKNQKSIASLTQTEPLGRAIWQTSLDVKSATEEYSSISHTLKSLSNIS<br>QLRDKMIDQSRDVERIKEIWDIYTSGEGRMGQIRLGA'YKEFPHEFFSKVANSMEERV<br>TRYKKTITLNRVVASLSSDSQTSPPVIAQTINNHQQAILALAAQLDQLQVRMGLK<br>AEFTADWRDKTGSVRDPFEMAREERNVKV                                                                                                                        |
| Wallemia sebi            | Fungi   | tr I4Y9E0     | MSLFGNTTSGGGFNFGATAQPPQQQASGGFGGGSNTQASNTAAKPSLFGGA<br>AAPTATQPPATTGGGFGGQQTQPPQNNQQQTQPTGLFGSQQQSSTTGGTGGF<br>GQQQQQQQPPQQTNPLGASTNTPFGASTGFGTTTLNQNQTQNAQNTSQTKAL<br>TRTTKFNLDLPAHRKIIEIDIAHQGRSHIALKAEPLKGDVDRSSVLLDQVSNLMS<br>LOGTLASTAASLDSLKNDTEQDTRVALTMTRIIDGYRRPQESGAWLKTYRDFHEFF<br>AQTAVDLKDRANKYGTLEQIEKHSYLLTANAAGHTPQSIQILQTOHATFMSLASN<br>VAELAAATNLKDGVRDIWRSKTSYADPFALS NVESNM                                                                                                                                                                                                                                           |
| Puccinia graminis        | Fungi   | tr E3L419     | MFGASNSASAAPSSGGLFGSAKPNQNSGNIFGSSSTTSGGLFGASTTTSTPQTG<br>LFGSSTSAATTPQTLFGSTNQATGQQTGSNLFGASSQNTTSTNLFGSNNTG<br>GGTGNLFGSTQGNSTPGLFGSSNLQNAQQSGSNLFGSSNQNTPTNLFGSTNN<br>NLNTSGVGNLFGGNQNSAPLGNISFGTKASSVPTPAPSVSQSNPVRTTRTFRNDM<br>PEDAKKQLETLDMIQTQCRHSOTLKAMQLGTEITEGTSLLRQVTESEMHAATSASVKT<br>SSNLLDSIRQSIDGDVADLLNLAIVDAHHSORMAVGSHNAAESLPNPMKFFQEFFS<br>KQAADMEERVKRYRQTDIYVELQLKGLFDRPSPASIVPALKAQYSTFMVLADKVAQL<br>DTAVRNLKEERYDIWRHQTGSVRDPFAEIDQAFGLGSSTATFQAG                                                                                                                                                                  |
| Homo sapiens             | Metazoa | sp Q9BVL2     | MSTGFSFGSGTLGSTTVAAGGTSTGGVFSFGTGASSNPSVGLNFGNLGSTSTPAT<br>SAPSSGFGTGLFGSKPATGFTLGGTNTGIATITITGLTGTATTSAATGFSGLFNK<br>PAASATPFALPITTSASGLTSSALTSTPAASTGFTLNLNGLGTTATTTASTGLSLGG<br>ALAGLGGSLFQSTNTGTSGLGNALGLTGTAAATSTAGNEGLGIDFSSSDKAS<br>DKGTGRPEDSKALKDENLPPVICQDVENLQKVFKEQKQVQEEISRMSSKAMKLVQE<br>DIKALKQLLSLAANGIQRNTLNIDKIKIETAQELKNAEIALRQKTTPPQLQHEVAAAPD<br>YFRILVQFVEQLQYRQIEELENHLATQANNSHITPQDLMSAMQKIYQTFVALAA<br>QLQSIHENVKVLKEQYLYRKMFLGDVDFVETRRAEAKKWQNTPRVTTPFPST<br>MPNAAVAMAATLQQQPATGPQPSLGVSGTFFGSGGIGTGLQSSGLGSSNLGG<br>FGTSSGFGCSTTGASTGFGTNTNPKPSGLSAGFSSSTSGFNFNSPGITASAGLTF<br>GVSNPASAGFGTGGQLLQKKPPAGNKRGRK |
| Hymeno-lepis microstoma  | Metazoa | NCBI CDS28776 | MALLASLSNLDKQKQDQVPEILTVVEELKKYLAEQKIRDEVAKTSNKQLDLS<br>TELQKQSRVNTNLSGLRRONVKSLSHEEILQERNITGIIQRSLDMSDFQNSPEI<br>NEYFKCISFSNRVQYKQEVLAENSLSSRAKSNLTPKELSDILRKLDDTFMSLAA<br>QLYSLNEQLSVPKAHILRQYQSLDSGQIEESSTAASMSLFDIELFSEKKSANTPYGP<br>SPFSSVTVTGAQAATASGLPSLGLVTPQPTVTTSSAFSLSALKPSSGASSFSL<br>GGTTASALSSGFLGGLGAKASTSTPSTAFSFGSNTLASSGTTTTNSTGFLGST<br>ASGQLSTGFGFGLTATPTTTASTGFGFGTNGTSTIFGSPATKPSLFGSK                                                                                                                                                                                                                              |
| Hydra vulgaris           | Metazoa | tr T2M6T6     | KTESERKVMATSSGFTFGATNNSNIFGAKTTTSTFSFGTAPAFSGFGLSNTSNAS<br>TLAFGATNTNPGFSGFGGAGLSTSLPSSSTGSLFGSKPATGFSFDTKSTTAT<br>SLPFQLGVAATSAPQQLQSDSSALAKPLENPKKEVPAEFVYINETENYLKTORELK<br>DEIRISSQTVNEIQDQLNTMNAIAIISNSLORDKLAAYELKNQVQELKNTETARLI<br>RDLPLNHLDFNAPMQYFQSLVLTQIRIKRSRQIEEELVFLSSSSPNSQFTPQDLK<br>VVLKRLSEFLGLAAELQTVHEAVKMIKQYLOFLRSTFNNDYSDPFTSRKRLREK<br>EPSPDFNGSPFPPIQGGIISGAFKIDNKPQNLGYNLRNNSAFFPKPSGTGLTRLSDF<br>EIAKSTPFSVSTEFSSSTNNLPLGQSPATSSSSNSFKLRNPPNGKRGLY                                                                                                                                                            |
| Ciona intestinalis       | Metazoa | tr F6TX13     | MAFKGFGTSTNGSGGFGSFGASSSTAATKTTQSSTGFSFGAPASTGLGFGAKPT<br>YSAPSLGANQSKPATGFSLGGSAATKPTLFGGQTASTASTASALTLGSGTQPTTKP<br>AFKGLGGVDLSTASTSNGNGKNNNGISQAVKQDQVPEEICKDVKAFFESYVQKOKS<br>ESNEVGFKFSVRSLOKINEEINLSVAVGTISSAVQRNKAASESIRNEFTNLKNEIEA<br>HRTQDTPAALQHENIPIKYFIDLVEFSISMQSYRQHMEELNHLHSLAQPSGMNP<br>QDLSMALCKMQESFITLASNLHSIHDSVKHIKEQYLA'YRKYVHGDHDFIKQINIPVA<br>KSKKIEGPSAFSNLSNVAALAMASMLQPPQQQQQAPPPQQGFLGQTKTNTLFGP<br>NASGSLFGSTKPTVTTGSLFGSKPTLSTTGGFGGFGSTNLPALSAGLATSTSGNMF<br>FGGSTTFSSAGLNSSTGKRNNK                                                                                                                       |
| Crassostrea gigas        | Metazoa | tr K1QL21     | MFGGKPNPTPGFTGATPSAGSTPATGGGFSFGTSTQATGNVSFAAVGQTPAA<br>GPTSSFSFGATPASTGGFLGGTTPSPFSTQSSTAAPTGFALGSTASTQSGGF<br>KLGTTLLPAPFGTSTAPGTTAVAPAMGFAMPISSTATVGGGLGMGLGGAV<br>KPTLSTSTLGLLNTQTPAAKPAQILGATTATGVSFVGPATTSQTMGLGGVDPKT<br>STTAAGGSAADPKAGDGKTLKKSQVPEIVKTVEFKTYIKEEKTVEGEGISRMSCFL<br>MYKQVEDV'ASLKQLLSIVSNGLQRNACAVEKLEKEMTQELKNAEMAQRKTDYFAGL<br>QYENTAPTEYFQRLVENFETQMLSYRQIQIETLEGLHLSISQPSILSPEELVELLRKHL<br>ETFIALAQLHQVHEAVKQKEHYLNYR'KIFLHDTKNIFEREKKA'V'PKVLPPEHFGPK<br>LVELLRKLHET'FIALAQLHQVHEAVKIYGFGSTAATTTTTSSGFTGLNTAVRPLGF<br>GTPAAPTTTTTPSLFGTPTVQTPAFGTPQGFPSAGGEQPFQLNKPGRKTLGFL<br>GICGSEAKMYFSH                |

|                          |         |           |                                                                                                                                                                                                                                                                                                                                                                                                                                                                                                                                                                                                                                                                                                                                             |
|--------------------------|---------|-----------|---------------------------------------------------------------------------------------------------------------------------------------------------------------------------------------------------------------------------------------------------------------------------------------------------------------------------------------------------------------------------------------------------------------------------------------------------------------------------------------------------------------------------------------------------------------------------------------------------------------------------------------------------------------------------------------------------------------------------------------------|
| Drosophila melanogaster  | Metazoa | sp Q9VDV3 | MFTPTTNNIAIGGATAATGAFAGARPATTTAPPPSFGAATSTPTFGAAPTSLFAA<br>PAATPAFGAPAATPAFGAPASTPGFGATSTAAPAFGTAATAAFGIPAAATSAFGAPA<br>ATPAFGAAAAATPAFGAPAATPAFGAPAATSAFGAPAATTAAGAPASTQASAFGAPA<br>PAVGTVAFTFSFATPATSAPTTAPPAFGFTTATTAAMPASLSSGIGSFSPKPO<br>ATTAASLNFNNTTTTATAQPFNTGLKLGTTNATTTLGGGGIFSKPAGQAAAPASTFV<br>GLGGIDVATQPKLGDNDKQDGKIKETQVPEIITKVDGLKAYIKQKTISSDIGRTS<br>KFTNVSHITNLKVALQNMATLVEGSNQIIRLMRQETVKAIQSLEMAQRQTQDTPAG<br>LQFENNAPPFYQCLVAKYEQDLIAFRQOIALTERHMHAINPQSSIPDDLKRGFRQL<br>NESFISLAGRLHEVHQRVVEEHKEHYLNLRRLRDTTTFVERIDNPPLTPVEPQRISS<br>GPTPFSNISALMNKSYAAAAASSASATGN                                                                                                                                                    |
| Amphimedon queenslandica | Metazoa | tr I1GF79 | MAQQFNPKLSFNLPQPGQQLGLGTGRGLNLAGPSTGGGLNQQGGGIGARNGL<br>TGTTAAPTGLTGLAPAPTGLTGANKPVLITIGTGLTAPSSIQPGLAGLMSQPQGTGL<br>AGLASSQSGLTGLTQPGTGLTGLAGSTSQPGQIGLAGLTVSQPGTGLTIGKTG<br>QMSLTGLTTTQPGTGLTTTQPGTGLTGLTTTQPGQIKLTTGLTAPQGLKGLGT<br>IGQPSLGTSKTGLTGLTSLTTTSGIGLTTTTSATGPRVTGLGGVNDITQKSOQVSV<br>SAGALPDEFQQLVVSQFETLANLKTSDTISKSSSETFEKKFRSVGDHIDTQQQATV<br>VSQELHQLNHSLSLKDETHKEGRVLEIAQRTRELPTGLQHENTTPDEYFKRTDHF<br>EKRMFRFRNQLLELESYLHVAVSASSYSSQLSGPDIISALNAQYRPFVLAARLQVI<br>HEEIQRLKEQYINLRRLMGLDSTDLFVATSNQSKKSKDKSSESQVGPSPFAASIQ<br>ATAALAMATAGQFGNSGIGTGGIGTSLGGIGPSPGGIGTNTGGIGTGGIGRIPGN<br>AGIGLPGPTTIGMGANRMGMGTSGLGMGTGLSSGIGTGLGASGGIGMGLGTG<br>LRTGAGLGTGIGTGLGGGAGMGTGLSGIGTGLGGMGTGLGGLGGGTGLSVAGTT<br>KPFQLKPPPGKRR |
| Helobdella robusta       | Metazoa | tr T1FRH9 | MQQPLGLGSGFGGSSLLGSSAAPASSVPTGLGGFSGFGQASNASSNGFSLGG<br>GGTSQPQQSTAFFGLPAATTTSTTGALPDPVLLGGGLALMTTTSALTFGNLSAQSV<br>AAATTTTTFNSNSTQQFQGLGGTDFKPLSSGASAVTTDNSKISSGTVSKVDHILPT<br>FISLVEDFNKNVRSQKSIRESISRSSQKSLKIEEDVRDLRQQMNFVAASLQKISTCV<br>DSLKKESTQELRNAEIAQRTNDSLQHMQLSDYKSPYEFQNLVKFEQEMDLCRTQ<br>FSEVETYLESLNSNLAIPAELSCIFDKLNEGFLFAAKLQVHVHELKAKKELGYSQY<br>RNDIYSDRVDFKAPSSKIINKNATDDINNINSLNNSLSIIKSSISNVSSSSGVN<br>AVSSGSGSVSGSRAASLNPFYINNMAMTAMTSAVGSQQQQQPGSGLGQQ<br>QQQQQQQLQQQNKMLKHNLFNSNRNQNNDSSSFLVLSNLNNDANLKGCKR<br>GKPLS                                                                                                                                                                                               |
| Arabidopsis thaliana     | Plantae | sp Q8RWH9 | MSFFPPQQQTPQPLFQQTSLFQPPQNTSIFSQSQPQQTNSIFSQSQPQQTNSI<br>FQQQQQQQSTLFPQPPQFQQQQQLNQQQQQQVQQQLYLFTNDKAPANYSTKW<br>ADLHPDSQKLLQIEEKILHRSESRQLDQCSRLYDSSVSSGFEFADSRIVQELGGI<br>NTAMDRQKAVLHELMIVAKDMLRNAEIAVRSMMLQPRFPHWKQGGGVVSVGSQP<br>SQGGQNTNAPASSGQQQAVTTTQVSDYFRGIPKPTAFLLTQTVRFEKYLNECRS<br>VVEELEQLLALDSKYRSHASLLESLPKVMSNVHDFVHVAAKVESIHQYIESMRTS<br>YLADQRRRGECHDPFLEADRRETAKEAAAKRVHPTLHLPASTTQTPSTQVAGLI<br>ASSATPGGSSNPPQTSVPTSNPSSGAGFSLNTPASGSSSLFATPSSTAPTSLSFGP<br>SPTPTQTLFGSSPASTFGSTQSLFGQTTPSLTPMSQFGGATPGSGASFGSMTKSS<br>RPSKRTTR                                                                                                                                                                                        |
| Oryza sativa             | Plantae | tr B8BCJ8 | MAFSFASPAPQNPFTPAQAPSLSPSPFQNLQQPQQQQQQPPQQAAPAAQ<br>FQQQQQQMLLTYTDGKPAQYNTKWEELHAESQKALLQIEDKREYRDESERLDQC<br>SRLHDSSTVNFENDASEIAQELGGTTMMEREKASVQELMTVNNEMMRNTEFAIR<br>SYMMLRPRFIRPGAGANGGSSNPSGPAQAQSNQVALAPTIDFYSIGIPKRPSEFMQ<br>QTNIRFEKYLGCECKWIAEQLVQMNENKRSASLESPLKVMNSNVHDFVHVAAKVESI<br>ENLHUYVESLKYELHEORRLGNANDPFLANRREAAKQEAARVRHPTLHLPASV<br>PQTTQIAGTVTSQPQQSLIPSGATSSAFPSFSTPASPSSSLFSTPTPTLSSNLF<br>GTSQSAQLSTPFGTVSTPTLGTSTPAPSGFNTTSPFASTPALGGTSLSTPFGGGAT<br>ASGSSFGGTSKVRSKPRGR                                                                                                                                                                                                                                        |
| Amborella trichopoda     | Plantae | tr U5D5J3 | MAFSFGNSPLQQTPLIQNYAFPQQQQQQVQQQMYLFTNEKAPASYQTTWS<br>DLHPESQKLLIEIERILEYRVESQRDLQCSRLYDTSVNSDAFELDACHIQELGGIST<br>AMEREKILLQELMSVVGMRRNTEVAVVSMMLHPRFVHTRGSTTTHSTPPIGSA<br>MTHANPNTQKATSVVVIDYSGIPRPSFLQHTVARFEKYLAECRQWIEELEQL<br>LLRSGDENGNNTD.LTLLDPLAVMSNVHDFVHVAAKVETLHQHMESMRAAYLAD<br>QRRRGEENDPFLADRRETAKEVAAARVRHPTLHLPSPQPLTQVAGLFASSPSS<br>SSFPGASSSTPIMAGGTSGGFSLFNTPSASTSTSNLSSSLFATPNLQATPFASSRLS<br>QSSSLFGTPTTTPSLFGSSSTPSLLGSAPSATPAFGLSPTSTPAIGPGTGLSFGATT<br>AFEDEFVVKSCD.LLLQKLSGLDLPKGFWEYKAKEP                                                                                                                                                                                                                       |
| Physcomitrella patens    | Plantae | tr A9SFH0 | MAGMFQTPMNFQQAQQMQAQQGGGTQHILLTNDKMPVSYQTKWADISPESQL<br>LLTIERVREYREESRRLQREQNTDSSVLHKSFEYDAARILQELSAVGGAIERETAG<br>VRENQADASLQLLHAEMAVRSFLSLRPRFIAAQAQLYDFYSGMPPARPSPFLQQTVI<br>RFENQMAEYRQRIEMERLLLNTKENSYGSQSLLLQSLPSVMTNVHDFVHVAE<br>VEELHQHTGAMRTAFLQERHRRGDDSDPVEAERRAIAQRDAAKRIVHPTLHLPASV<br>PQTVTPTAPVGTSTPGMFGGTQPGIFQISSTPVASQSLFGSTPTPTSLNFGSTTP<br>STNLFGSTTPNLFSTLTTGGSSSLFGSTLSTTPQGEFECLTSLY                                                                                                                                                                                                                                                                                                                                |
| Volvox carteri           | Plantae | tr D8U1A0 | MAFSFGSTAPATPFTGGLFGAPAASSASAFGTSTVPAFGAASAPAFGASSAPAFG<br>ASSAPAFGASTAPAFGSATPFGAPAAGSTSPSLFGSTTTGFTNLFGQPASAPYTS<br>TALVPAAGLFGAQPPQQAQQLQPPRPLNYKTKFEELPPQIQELQKIQQISSYR<br>DECKALDNDARLYDTSIKQDLSETAALRQLTQSLYQAVLAEDEGLLAFREYVML<br>LRSTETAIRLYQRSKLRWEISQVPGPGSGQQQLLTAQVDDQMSQPVLQPNPVLGL<br>AVRFGSAIEQYHSCISELERVMQASAVYGGTDEATAILNLPVLVSHMHNYFVHVA<br>ARMERLYGVARAREAYLAQQRARGDYSPFAEARPLHHPAGPGKLAALGGSS<br>AASSNFYSGGAPAGGGMGPGGGIMGPGGGGGGGGGMFGGGGSTAPAPAP<br>APMPSLGAAGGNTASGGGLGGLNPVAFGSSASPFDRYR                                                                                                                                                                                                                           |
| Chlorella variabilis     | Plantae | tr E1Z6R8 | MSFSGAASPFAFGAASSAAPAFGQAAPAFGAAPSPFGGGVATPAFGASSALFGA<br>TPAPSLFGGGPSTAFGQSSAAGASPSLFGAAAPTVPAGPSQQVATLTKDNRPIHIS<br>SKWDDLSPTQQLYLEKVVVQYREDRCQLDNDPRLASGSGAKEQEQEAMQAQA<br>RSLQAISALGSAVKADVEQVQALREAVLYLVRSTDTALHTFKRAHAWREASASAP<br>LASQDIAGPPVLAQFLREAVAMFLDRKQHQAAVAELQVLLASGATGQMLRRAS<br>GGNSHPADGLAALQALTNVHDFLIHTAARLQALDDRVAAAREAFARRRAAGDS<br>SDPFAEEERRQHRSAPRSPAAQAAALQAQPHAAQPPGTGYTTTTFGMSP<br>APASHAASGGLFGTLQSPGGAFGTPLNFGDAQQQRSAPTSRRKPSRRR                                                                                                                                                                                                                                                                            |



|                          |                |           |                                                                                                                                                                                                                                                                                                                                                                                                                                                                                                                                                                                                                                                                                                                                                                                                                                                                                                                                         |
|--------------------------|----------------|-----------|-----------------------------------------------------------------------------------------------------------------------------------------------------------------------------------------------------------------------------------------------------------------------------------------------------------------------------------------------------------------------------------------------------------------------------------------------------------------------------------------------------------------------------------------------------------------------------------------------------------------------------------------------------------------------------------------------------------------------------------------------------------------------------------------------------------------------------------------------------------------------------------------------------------------------------------------|
| Phytophthora parasitica  | Stramenopiles  | tr V9EIM9 | MAFSFGGTAAPAAASSGFSFGSTPAAPAAASSGFSFGATSAAPAAASSGFSFGSSAA<br>PAASSGFSFGATPAAPAAASSGFSFGATPAAPAAASSGFSFGAKPASTPSTGFSFGAS<br>TAPASTAPSLFGTTGATTTTAPPTGFGFGGFGTQQPAAATGGFGGFGTAQPAAPATQP<br>AGPPITLFAFEALPDDVKKNMTQFHAFLEKQDQSDAFLKTVSPRQMEVLRNEM<br>LEQEVLLARRNRQDRQTAAVQVHRQDVRQLLHQVDAATLRRSLDSSNGGTPNMYH<br>VMRRVEMPSPYYWELLDHYEQKMAIKAQIEDVEAQFKPLYDGRSNANATGAGAP<br>APAQLQQLLAQNAALMQAARVAEVHEKAEELRQLFLTKMREDLARHGEKNPAAF<br>QNPFDKRKSSSEADKRQADIKRFRSTVAPTIVTPQPAAPATGFGFGTASTATTAP<br>TSGFSFGSTAASAPAKTVSFNLTSTTATSVAAPPATTTITAAPLATGFTAPTAVTSFG<br>GSSFLPSATDTSAAVGSKRSGRAQKMRK                                                                                                                                                                                                                                                                                                                                                  |
| Albugo laibachii         | Stramenopiles  | tr F0W7S3 | MKTSRESMRLCSEAFNKNNSVSTFCLENTICIAMSFSSSTPNSSGFQFGNPSNASS<br>APSGSALTSKPFAFGSTWVANPATTPTFAFPFGNTSTPSTGNFTYGTPTPOPPIT<br>LETFLFEDLPNDVKNIAFAQFLKEQDQLEIFLQSSSENVLQKRLSLDLMQVQSRQ<br>HILARQNTSAHHIGKDVKHTVLQVDEASLILRSNMMDKQNGSTTLVAQIARNVHTPSPF<br>YWKLYESFENRMSHLKQOIEELQLCQSDMIRCNPSNDNIIQSNQSGIDSQSITND<br>SFHDIFVQQNAALMKVASLVAIHERNEKLRDRFLANMKQDYIKHGDIAAETFKFNPF<br>EQSQKRNLAEQERRQMLDTRFKTTVAPSLNVSQPPAVNMIASSTNSFTNPTTTP<br>NVFSGVSAPLNPATKHVTFDFGTSAAPATTTPSFGFGTNPICGTVPVTGAGSSSS<br>LSSSLTDKSKRSTRKTRR                                                                                                                                                                                                                                                                                                                                                                                                                        |
| Saprolegnia diclina      | Stramenopiles  | tr T0S2F3 | MAFSFGASGASAPATGGFSFGGASAPASTGFSFGGSTPAATSAAPASTGGFSF<br>GGSSGSSSTTTAAPASTGFSFGGNTPAAPAAAASSTGFSFGGSSSTPAAPASTGFS<br>FGGASATPAPASTGFSFGGNTTAPASTGFSFGGASSTPAAPASTGFPNGSTA<br>AAPSTSSFSFGSAPAAATPSLGFGAAPGNTKAIQLDRFEDLPADVQKQIEFGTFVKE<br>QSRSEASIRAVSSAKLTQLKESTHLEQAALVLQNIHARQAKNIGALKTVDKLVVQA<br>ESADQTHLHMTSETGIQRHEPMPSPYYWLSLQHFESRLATLKGQMDVHSLQQA<br>KHDDVSMDAEASTVHMTPRVLEQLQSQNEAFMRAAARVADVHERADTLRQDYL<br>SRQQAAPHGFLVRNPFEAADRVAEEERRIVDRIRLSAAQSTLPASSSTAATTA<br>APTAAASTLFSFGAATTPAAPAAATGGFSFGAAAATPAAPSAFGTSSFGAATGA<br>VPSLTKSVSFGSLGTQVTPDAGAFGANKSARRPKTKKR                                                                                                                                                                                                                                                                                                                                                       |
| Aphanomyces astaci       | Stramenopiles  | tr W4FE99 | MAFSFGGTTGAASSTTAPAFNFGSAAPAAATPSFGFGTASNAAPAAATTSFGGAPA<br>TSTGTPAWNLLGSSATPAATSTPSFSGGATTTPAAAPTSSFGFGSTQAPATGFAA<br>PASNAFSFGGNTTAAAPSTGFGGFGTSSNTQTSFLGKATSGGFGSFGAPSGF<br>GVAATPAQPPQPVVSLDMRFDALPPDVQTKIKDFHFLKEQSRSEASIRSVSAQPL<br>ADLQDQATKLEQVALVVRNIQTRAKAQIDQLKSDVKNVVSQAEAADQIHIHLSDTGI<br>QRTDEMPASYYWTLVQDFEQRMTLKCQMNVDVHTLQGLQQRHHPHMQHPTPQL<br>LQQLQSQNDAFMNIAAHVATTHEQAEVLDRQYATLQHQKQPDGGKVRNPFEEAD<br>RIQAEERRIVDRIRLSAAQVTFPAATGTTAPASSFSFNTPAAPATAAPAPSTFTG<br>TATGGTSFSPAVSTAAATPSAFGGAQPPPTLTKSVSFAGLGNVAPSADSNASGA<br>FGMPVNSLNPKSVRRKPSSTKRR                                                                                                                                                                                                                                                                                                                                                                  |
| Thalassiosira pseudonana | Stramenopiles  | tr B8BZW1 | MAFSFGAPTAAPTAASTSFSGGATAAAPAFGAPSSAAPSTSLFGSTPAASTTAP<br>STSLFGGTPAPASGGGGLFGSNPVLFAFNSIQAPAPSTSLFGSTPAPSTGGFLGSGT<br>AAPSTSLFGAPSSAVNSGGLFGSTGSAAPAFGTAQPPQQQQQQQQQHQHATPLS<br>ANTPYSQLPDSAKTKIDSIYQLMMQHRRTLASVKMTMAPSLLRIEGQENIHSASDSND<br>NIPSPADAAAGFAKRSSSSKKEPIDPSNMSLPOQMINLHTQINTLLRSAESNMAE<br>AQQLKSRAGNAACVAKMHGAWPVEVSAARRGVALSSVRAVLGDRKDASSGSRSDG<br>TSALGGGNGGTASSSTSSGGTPASSLNVSGMNNVDAVALQHMMDVRAASVDRME<br>TMPSPYLWVLFHNFEEVAIVQRDVDAVKARLTIAEEAERVAALGGSGMLPQDSTA<br>LLLSNNCFAAMASLMMYEGGGIGRQVPLCKQLASLARSQNEQFLRIAQAARVHEG<br>LEEVEKMYRRFCENNMITYGGHYEDPFLRADVEIRRELERQRIIEQLATVSPVK<br>TSFSTTTTSTAPATSSLFGTSPAAPSSGGLFGNPPAPAPSTGLFGAPGVFGAPSPA<br>PSTSLFGAAPTAPSTSLFGSTPAPAPSTGGLFGSTPAAPAAATGGLFGNPSAPAT<br>EGLFATPTTAPTLAPRKKPGSRSGGRRR                                                                                                                                                                      |
| Thalassiosira oceanica   | Stramenopiles  | tr K0TB43 | MFLQKPYITNNTLTVQPRQLEEFASALLAMRRAFSGAQRVLRNKKILRTQNNIPHM<br>NKYCSYHLRPAFSAFGAAGPYTKNAEFSWLSLSESLTLQPAAPAFGSAQQAQSSP<br>VFGNTPYSQLPDNKRAIDQIYQLMMQHRRTLASVKMTMAPALLADQSSCTDSMNE<br>KVSPADAAAGSPKRTTPTQDETLSSQMVGLNSIQITLQSAESNMEAHQKLSRAG<br>EATAQAALHGAVPVENVAAARRGVALSSIREALNDPSGEPAGSAGSNNGKPAASVNV<br>SGMTNLDIALQIMDIRASHVDRVEAMPSPYYVLFHNFQRVIAVQRDVDAVRSR<br>LAIAEEAERVAQAISSGRMMGNDASLLSGGNANTMMMLYQNNHGQVPLPQKLS<br>LARSHSDAFIQISAQAARAHEGLAEVKLRYQLCQQRQGYDDPFLKADVEEISRER<br>EMQHRIRIEQIATAPPEPKPAQAAPSTGLFGAKSPAPATGGGLFGAPAPSGGGLF<br>GSTPTSKLSFSSCQIPLHLSQLLTCVPDEGGGLFGSTTAPAGGGLFGSTTPAPAA<br>APAAGGGLFGSKAPGNNTSMRVFVPLHVYLTFOFLAAPAAGGGLFGSTTPGNHSW<br>TCCCPVARLFLRFSIPAAPAAGGGLFGSTTPAAPAAGGGLFGSTTPGTSKDSASA<br>MHASPSDIVFLAAPAAGFGGKTSITHI                                                                                                                                                                           |
| Capsaspora owczarzewski  | Filasterea     | tr E9BYV3 | MGGYGYQQQQQPGMGMNAGLGAAGMGRGLMGAAAPGQPMGLMGQQQM<br>GGMGGQQLNPMGQQMGQMGHQMGMGMGMGMPQQMGQQMGQQMGQ<br>QMGGAGQMGMGAGAMATPAQQQQQQQMGGYATPQQAATGYPQQGAMNAGA<br>VQQQLFQTPQHQAQVAGAGMMGATPGALPGAMPGAMPAMGLGAPKIGMGAAGM<br>GAAALPGAIGATPGAAPGLGMGAGLGMGAAAGLGAARPAAGLGGIGGAAPGAAAA<br>GGLGAVPAMGAMGAMGALGAARPPGALGAGLGAAPGAAAAPGALGGLAAGGLGA<br>ARPPAALGALGAARPPGALGVPGAAAAVPGAAAALPGAVPGAAVPTALGAPAAA<br>AGGLAGGLVVRPTGLPVGGLAGAAPAGLAGAAPGLGALGAPRPLGA<br>PGAALGAPGALGAPGVLAGARPPGALGAVPGALGAPGAAGLGARPIGGVPGAPQ<br>SFGILSSAPTVMNTKFSPELWKRKLLDLEKSIATQKSASNEIANHTNARALNVA<br>ARCKTLQKAAVLATTIERDVTVIDRLKRDVVQELKNAEMASRTLARLKMPIPMQLE<br>EMASADYFNHLVTFNENRMQNYRQHIEELEAHLSSISEREQMTPOALSQIMRNQH<br>ETFLALAAQVQLHDAVQEQKELFLSHSAGDPFAARKKAKEAQVKRPIPASGGLTE<br>SSLRYNTPAQAAPRPAAGGAGLGVRRPAGALGAPALGGLGAAGGLGAYRPPG<br>QLGAVGGLGGAGALGGAGALGAAGALGGLGAPRPLGALGQPGALGQPGALGQ<br>GALGQPGALGQPGLLGAQPAAGGLGGMGAMAPQVAGAVPLNVAATGSDLLARR<br>MQNKV |
| Naegleria gruberi        | Hetero-lobosea | tr D2V106 | MSGFTFNFGGGGATTQPASTTTATTTGGTTGGGGGFSFGANTTQPAATTTGGTT<br>GGFNFGGTTNPTTTGTTATTTGGTGGFSFGTPTTGGTTTQPTTGGFNFGGTT<br>TAPTITGATGTTNTTTTAPTITGTFNFGGSTAPTNTNTLTTNNNTTNTATVTPQPI<br>TPKTQFQKLPDQMKQWQEFQEKETTKRNAMDIVKQENSSDLNKKRIQVVEK<br>KINTSKVNITRAKDNVERIKHDVLESKNAEQANNFNKLRSAYNTDNPYSSTYFIN<br>TAQLEQRMQEIKQIEDVAQTLSHSEAYQLPFGQLLQGTIVSQQAFFNAARSLY<br>LHEKANELRDEYIRTYQIRGDPFKEPSKTSKPSYNSKLSNSSSLPGLNIPTTQPTTS<br>TTTQPTTNTSGFNLTNTGFLTNTATTTGTTTGFAGFTPTTNTANTGTGFNFSTQ<br>AGSSSNKRRM                                                                                                                                                                                                                                                                                                                                                                                                                                              |

|                              |               |                           |                                                                                                                                                                                                                                                                                                                                                                                                                                                                                                                                                                                                                                                                                                                       |
|------------------------------|---------------|---------------------------|-----------------------------------------------------------------------------------------------------------------------------------------------------------------------------------------------------------------------------------------------------------------------------------------------------------------------------------------------------------------------------------------------------------------------------------------------------------------------------------------------------------------------------------------------------------------------------------------------------------------------------------------------------------------------------------------------------------------------|
| Acanthamoeba castellanii     | Amoebozoa     | tr L8GM16                 | MRSDEIAQHSFDALPKVKSEVEVATERLNALYNTLQGDMMETVAEIRSNITKELNAEV<br>AVRYTERLAANVPLISQQNLVLPQYFRELLEGTFEKRMQYRHLVHEILQRLRENEPK<br>TYTPQMLQDLRHQYEFAMAAAARVADLHEATEASKEQYVALRNQATGGNETVEDL<br>FEKEEKRRQRQKAKMLPLATPAASAPAPAGASTPAGAATPSAGGGLWPSGTGATPT<br>SGTGAASSTPFSFNMGSAFTPATPTSPAAATTTSPFSGAAATPTASTPASLTSS<br>LFGSSQTSAGGLGFSTAGTALSFPPTTATRPSSSGGRPTTGRKGGK                                                                                                                                                                                                                                                                                                                                                            |
| Reticulomyxa filosa          | Rhizaria      | tr X6NSJ8                 | MSFDWDNSSKKKNENKDSNFVRLTDHLKSLSEEKQKPFMFQFELQONKKNLKYQAF<br>FNVICIQTTRKKNDRRNVKVNNEQQEQVKQVTEVLQQFDMSSVLKAYSEETEML<br>MDKLERVYKHDLEPLFERLRIEFVSHVQAQVERLNRKMSGMTMSSFRPALPPTYVVD<br>QIKYFETKIEECRNLKDIQQHLRDYDDKDFANRQLQSLSPVVLVHLQSTHRAETEYI<br>AGQVVLVHKQVEDLKNAYRFRTRDYGDTTDPFSQTSKSDQYRRESIKTLLESLGLQ<br>HFEPQPVSWGKKEETSQPSNEKKKDSWFDNNTNKDTSQENWNFDSSKSSQG<br>WGGNTSSSGGWMEVEQVGE                                                                                                                                                                                                                                                                                                                                |
| Trichomonas vaginalis        | Parabasalids  | tr A2EXQ3                 | MFGKTSLSLGGKAVYGPTEVEGMLIQDLEVEARNILIDTYNNAVNLFAKEKPIDGLDS<br>FGKITDLYDDVNRNINHTLHLANEIDHGNMKEARDELDTFHRDYDLSLHSQTFP<br>SPFISFRDNLQQRSKNLSEAITSYETKLNNEQAESPVLVQVLEQYNAIIRCASR<br>VSEIQRKSQSLHETFKRIFQNKDRKISDLRLDSEENKQSVVNSVQTADEYLEERR<br>RLEEKRDTTDFSTICAPDTKAGGLFGKSKFSFGSGNSLNLKNGTALSALPKAGT                                                                                                                                                                                                                                                                                                                                                                                                                   |
| Trichomonas vaginalis        | Parabasalids  | tr A2FLI5                 | MQFGMGKAIWPEDIKPIPEDTVITENEKFLKNTQFLGFVTQLLEIQSDFTTKVPLKE<br>GVESFNKVMNEIENATRALQHTLTLTSLNEVNFVSGSVIDDSREKDEFRRSRQIQSN<br>SNQTFPSAFFTKYVEDIDKKAIEITDAIKLYERSLEPPKYSTNPTLQIMFQHDIAIR<br>CASKMADIKDKTNKLLERVSDRYKNNGLKTDILDSKEAETEKMSDAIHIAAYKYVLYN<br>KRKADLEKRDKKNFEELCKGTATNTFGSLGGGLGKIGGGTSTSTSTGTSLSL<br>KK                                                                                                                                                                                                                                                                                                                                                                                                       |
| Cryptosporidium parvum       | Alveolata     | tr Q5CRQ4                 | MFFSQTNVGNVSTAGLGLFGSTGPGGAASNLNLSASITQTGQSITPPAIPGNLSFQL<br>SNSQSGISNSNLFGTNSLNNSSIGLSTGNSVSLFGASQTONQPQTQINPQAQYL<br>PLNPTIGLQTLNYIQSWKAFFDEIENQLRGNDKHIEYLNNKLIETRLCSTYKKGVERR<br>NEEIEINKSLQFRAQDSIESVISEITVQQLSHDITHYDRIKDIDQNNSSRQIQLRFLP<br>PIFEFFCENMAKCKGIEIENLDRAVSSLREELTNATAEDVLKYAIEIINNYEAFYD<br>LVTKCSQLHDKTESVNNISKLHDAARN                                                                                                                                                                                                                                                                                                                                                                            |
| Cryptosporidium hominis      | Alveolata     | NCBI <br>XP_668308        | MFFSQTNVGNVSTAGLGLFGSTVPGAGSNLNLNLSANITQTGQSITPPAIPGNLSFQL<br>SNSQSGISNSNLFGTNSLNNSSIGLSTGNSVSLFGASQTONQPQTQINPQAQYL<br>PLNPTIGLQTLNYIQSWKAFFDEIENQLRGNDKHIEYLNNKLIETRLCSTYKKGVERR<br>NEEIEINKSLQFRAQDSIESVISEITVQQLSHDITHYDRIKDIDQNNSSRQIQLRFLP<br>PIFEFFCENMAKCKGIEIENLDRAVSSLREELTNATAEDVLKYAIEIINNYEAFYD<br>LVTKCSQLHDKTESVNNISKLHDAARN                                                                                                                                                                                                                                                                                                                                                                           |
| Cryptosporidium muris        | Alveolata     | NCBI <br>XP_002139<br>274 | MLFGQNPQLQSSGNAPSSGLNLFSGSNVNSTNSLNTNQNNLSFTTQVQVQSSSN<br>NTMWGSSSSSYGTTTNPQLFGNTGTNSNTSGLGNMGLGNSGVSTTTFGGLGLT<br>GSLTGNLGGIGSSGLTNTNIMGMMGGIGGIGGIGGIGGIGGIGGIGGIVGLRNTNGNS<br>GILGNLNNATRDLGLVLTGNSTNNTNSLFGTSLTSQTNCPGGAHYPLNPTVY<br>QLTNYIQSWKVDENIEKQLRENDKHIEYLNNKLIETRLCSTYKKGVERRSEDEIEN<br>KARQDRIVDSIEDIIPNISTLQQLSYDLIQYDRIKDIDQNNSSRQIQLRFLPPIFEFFCQ<br>NMSKCCQYIETIRRENTVSSLRNEINNMNGSETKRNIIQIINNHEIFTNLLTQCSAL<br>HDKSEFVSISKLHETSRS                                                                                                                                                                                                                                                                  |
| Aphanomyces invadans         | Oomycota      | NCBI <br>ETW04496         | MASKRESFSPMKSRLDEKTTLQELNNRLEMVYVLRVKEVQDSRDVAEKELETIRER<br>MQMDLSMTKTRLSKELEDTRKLEFEIDQKTRQLVLEQEHTLVKLRQVKEFGDI<br>RVELEQVQAEALAKEKESKAAKALALQTTSLQASARRKLDLDKENRKLTSLSDDTT<br>NELDLQKQKTSEFSLTRDTEITLVRKEMNAKHEALAAWRRESEERLHSEVAERAH<br>FEGQIQLRQVDEVNLELDSLKVEYERTANDYDESLKIRQSLTDKLSSTIETQYRNER<br>KKFQEDRKMVEANIDNARQARLAKETEFNDLMDIKIALDAEISAYRSILDREESRVGID<br>QANHSKRRKASLTPVKSSTTRQHKRRKSHSTGLRITLYNLNLEQGRITLENTGSALS<br>LSGWQVSSKATNVFAFPEDYVIQPNRVSVISGRNAAPTEEEKESMDFYVIKAM<br>WNTQADVAQLTNPSSGDDVSSYAEAGMYVDDDDVDAADTPAKDGGCMI                                                                                                                                                                        |
| TbNup53a / ScNsp1 / HsNup62: |               |                           |                                                                                                                                                                                                                                                                                                                                                                                                                                                                                                                                                                                                                                                                                                                       |
| Trypanosoma brucei           | Kinetoplastea | NCBI <br>XP_829614        | MKGFAVRGRAPSGGGFGQPAVDNATAAAPVLGFGSFGQSNTESVAGVTNPFQ<br>TANQSGGSAAPAGMGGFGSGPSTGGFVAGQTSSTATQAPVLPQTLVFGGATP<br>GKGGEGNSVVPVTVGAAAAASTSAAPTSGFSGFGSAGKATLNPFGAGGQSTTGG<br>TTATAPSTGGFGAATSAVGQTPASGATPANTTFDGSASNPGTGTNPTAGTATAVP<br>AATMTVNPSPGDTVKAGAPAAFGGFGATPPASGNSAAPTFFAGFGAGATAP<br>NPASTNATAGAATTGGGPFSSITKPSSETGGNAPPATAGAGGAGLGFSLGAVTGG<br>NQSAGATGTVGAGDPTAISGQASLELGRKMLSTILAQDFKAFSKDYRDFSELSQLM<br>MLRDRQIERGNEILSHSSHLEAIANADVTRQTLIELKNKQAAIGTMLQRFDVAQPI<br>FAQVRPTFNSVDEAREETYAVINLDFEVETLKLRLQCCVQRHNGSVRHLRQSDDL<br>AKFVGLIDCQLSAMEVCAAQASELEREVDLLLGKSTIA                                                                                                                                      |
| Trypanosoma congolense       | Kinetoplastea | NCBI <br>CCC96052         | MNSFTTAGGAPFGAGFQASATAPAAATGVPFAGFGGFFVQPAANAATASAPSAVQP<br>AGQTGAPACGFGNNSTAGLGFNTQPASASGQPLGFSFVAGTATTPGVPATGF<br>GGFGATTPAAPVPPQGAAPAAASFGTAPMTAIQNTAATAAPTSFGGTSFQSSPGTAA<br>PTPSSVPSAFPSSGGAPNMFGGTGPAAAAAATAASITGAASTPSAGLSTAGVVT<br>GSSVTPFAVAAPVAGPDGAAPSSAAPTPTGGFGGALFGGATAPPAEDSNGK<br>NATCLTOKHASTELQGMKLSAILAEFDKNFSKDYNDLLELSQLMMVDRDQIVRGENE<br>ILTHSQLDDAIAEAATKMLTGLKDKQVAIGAMLQRFEFAGVETAFQARPMFSNV<br>DEAREKMYGAVINLDFEVETLKLRLQCCVQRHNGSVRHLRQSDDLAKFVGLIDCQLNA<br>MEVCATQAAELEKEIDLLGRQTSV                                                                                                                                                                                                       |
| Trypanosoma cruzi            | Kinetoplastea | NCBI <br>XP_810212        | MNGFAGPSSVAGNNFNGGTFQAQSSGFGGNTGGFGMNTAAAGAGFGSMQNSAG<br>PIHQHQSSGEGFRGDFGAGFGSTFAGGFGFGSATTTSAPAAAGFGSAAHTSAP<br>AAGFGSAAHTSTPAVGGFGSATHSTPAAGGFGSAAHTSAPAAAGFGSATHST<br>PAAGGFGSATHSTPAVGGFGSATHSTPAVGGFGSATHSTPAAGGFGSATHST<br>APAVGGFGSATHSTPAVGGFGSATHSTPAAGGFGSAAHTSAPAAAGFGSATHST<br>APAAAGFGSATHSTPAAGGFGSATHSTPAVGGFGSAAHTSAPAAAGFGSATHST<br>SAPAAAGFGSAAHTSAPVGGFGSATHSTPAVGGFGSATHSTPAVGGFGSATHST<br>TSTPAAGGFGSAAHTSAPAAAGGFGSAAHTSTPAVGGFGSATHSTPAAGGFGSATH<br>TSTPAVGGFGSAAHTSAPAAAGGFGSATHSTPAAGGFGSAAHTSTPAVGGFGSATH<br>HTSAPVGGFGSATHSTPAVGGFGSATHSTPAAGGFGSATHSTPAVGGFGSATHST<br>TSTPAAGGFGSATHSTPAVGGFGSATHSTPAAGGFGSATHSTPAAGGFGSATHST<br>TSTPAAGGFGSATHSTPAAGGFGSATHSTPAAGGFGSATHSTPAAGGFGSATHST |

|                                        |                    |                            |                                                                                                                                                                                                                                                                                                                                                                                                                                                                                                                                                                                                                                                                                                        |
|----------------------------------------|--------------------|----------------------------|--------------------------------------------------------------------------------------------------------------------------------------------------------------------------------------------------------------------------------------------------------------------------------------------------------------------------------------------------------------------------------------------------------------------------------------------------------------------------------------------------------------------------------------------------------------------------------------------------------------------------------------------------------------------------------------------------------|
|                                        |                    |                            | TTSAPAAGGFGSATTTTSAAPAAGGFGSATTTTSAVAVGGNGLNSAAAATSGTAMGTC<br>KSAAEELKGLKALFSLAQFDKFAKDYREFQKLSQHMLFRDRQIIDRGNELAYISHLD<br>AAISSAEASKQRLSELKSKQGAIAAMMQRVEDAVQPIYAKVRPNFTKLEDEQREATYT<br>AVINLDFEVEAFRLRLSQSVAQHNRSLRQLRECDLERMAGLVDCQLSALERCSCR<br>AEELESEMDLLLGKNSAM                                                                                                                                                                                                                                                                                                                                                                                                                                 |
| Trypano-<br>soma vivax                 | Kineto-<br>plastea | NCBI <br>CCC54154          | MLEPPMETQSTLYHPVNFVMTLASVAYFLLTVQQVDVVPVAVFFSFQRPLLSLLPIHS<br>POAYGVHFAQAQCVYNGRVLFPFFASLVPSPVAGFVAVGAVSPAATGFGATTP<br>GATGFGATTTTAAATGFGATTTTAAATGFGATTTTAAATGFGATATPATTGFGATATP<br>TTGFGGSDVDPATTVTNMSADATARKELSGKMLSSILANFDFKNFSDRYHDFIELSQL<br>MMLRDRQIIDRGNELSHSHLSDAISFAEASQQSLAQLKAKONSISEMMQRLEDAV<br>EPIYARVRFPSKVDLREEAAYSLSLDFDETEALKLRLQECVQQHNRSLQQLHECD<br>DISKRVGLIDSQLSAMEVCVGOAAELEEELHQLLGKPDNV                                                                                                                                                                                                                                                                                      |
| Leishmania<br>braziliensis             | Kineto-<br>plastea | NCBI <br>XP_001567<br>611  | MAFNFASSATLGGGGSTPAGGFGNGLGSAVSTAPPAGGFSATATSVPALGF<br>NFSAGASTSAASAPATGTTIGLGGFAGNAASPSGSPASGFSTALQPPANPATPF<br>GTSFGGSEAAASAPATGTAAPAASTPFATASLTAAPISGGGGGGGTTTAAAAAPFS<br>GFTSTTTTLAAPVDATPATAPASALPASGAFGFAVAPAAAPTAKAPVGFPGFGGA<br>TSAATPSADGAKTSSGGFGLSTGIGAALNAASTLGDGSGSLAAPASFGGKLSL<br>APAPAAATGGFVTLNAPTSAGAGAAAAATLPAAGCGFNFGTGAETASSDAK<br>TVGATASSAATASPPAAATGGSTVFTAAGATSSSETRAEKAPLLSTAAAAASPQEF<br>GGKGLGAVLRKLDIDVALDQRNFADLARHVVARDRQIMARGRELTEVQSVVSDA<br>AAKSAEATLAECKQRAVSEYLSLQSLQEDKVPYQAQVFEQQQHHSTDPGRVDDQ<br>RAVTYDNVIALLEEVQGVEEKVGRAIRQHNSRNELLGLSEIEGTMRLIDGQLCALQ<br>CCSALASALELEDRLLGKAA                                                                               |
| Phytomo-<br>nas sp.<br>isolate EM1     | Kineto-<br>plastea | NCBI <br>CAVQ0100<br>01283 | MINFGAPASGGNVPSAPTAPSGGAPANPPPAGTGVNPTNAPPITSWGAGFATTP<br>PASVPAATATAASPFGGVSLGATASPAAGGTTASATNAPFGSIPPAAPTPTPPTSA<br>GGKGGFCFTADPAKAPAGPNAPAGGFGGQAAPPASTSTAPSPSPATAAMPMSGT<br>PFAAIPAAATISFGALPSTGAAPASTAAPASTAAPTAASTLFTPTGAAPTSTEGSAP<br>PLANGATSSSTTTPAISFGAPPSTGAAPTSAAAPTSPPLGSPNEGKPDADTDTGKPLS<br>KILGAFDKHFHYAQQDFTELAKHVVLDRHLLERKLDLSSHTIKGALSVAHAKSTRL<br>RECGEKQKAMDRLQTMEEAVEPFAFRVAAASVLSPTGEGSSASGVLSQADITRY<br>LAFQHAIAVYDEMMLGQSKLEGAVGRHRQDFEETRQGEVSRVMGLVAGQLSALD<br>SCSELAALLETELEKLLGSS                                                                                                                                                                                        |
| Crithidia<br>fasciculata               | Kineto-<br>plastea | NCBI <br>AODS0100<br>3144  | TAPAPADGAKAPAAAPVASASSPGASPSQEFAGKTLSSVLAKLDITYAADQRHFAE<br>LAQHVVARDRQIMTRGRELMEQVSIKVDVAATAKSAEATLKECKQRQAALSDYLQA<br>LEEKVQPRYREWEEQQQQQQQQSHDTRGMDDQQRVIAVDSVMTLLEEVQSVEDK<br>VSRVVRQHNHARTELLARSEVEGTMRMIDGQLLALQCCSTLATALEVELDRLLGKSE                                                                                                                                                                                                                                                                                                                                                                                                                                                            |
| Herpeto-<br>monas<br>muscarum          | Kineto-<br>plastea | NCBI <br>AUXJ01006<br>122  | TAAAAAAGGFGFKAPAAPGAAAPAAAGGFGAAPAAAAAAPAAAGGFGFKAP<br>AAAASTAAAPATAAAAAGGFGSGAASTATPAPGAAAAASAAALPSSAQEFAG<br>KTLAIIKGLDKTYAEDKHAFTDVVRLVQARDRGAIEKTAELAAASYTIKDAVAARAT<br>AALDDCHDKQSSITKLELDEALVNPVYSRAIEAAGRAEGGTTTTAAAAALPAA<br>DRTRIAAFDAVALFDEVQALQRLDAAVRQHRHARRGMRAADGSGGEGHRSFGE<br>LGGMIALSVQLSALETCGAMAESLERSLDSLGRP                                                                                                                                                                                                                                                                                                                                                                       |
| Trypano-<br>plasma<br>borreli          | Kineto-<br>plastea | non-public                 | ATTPGFGSAATDQVTSKGVTPQEVQEAAMELKGKTLGKILQEWDRFETDDYQNFH<br>SAAIRVKGDRDREIVDYGNAISMTAQLDAAIESATATKNHFSEIVAVNLNLDVQKL<br>TOSVEAEKSNISNTKQYIDETNADKGDGGRARVDEQREMTYRDVVRLDFEQLSLA<br>HSLDQLEQHNVNATARNEDCDRIVRVLDYQLTAVHDLYRKVADLEDIISTYGL                                                                                                                                                                                                                                                                                                                                                                                                                                                                |
| Bodo<br>saltans                        | Kineto-<br>plastea | GeneDB <br>scaffold458     | CRIRRSSRSSSCNSTTAAAPAGFGASPAAPAGSTGLAAPAADTKPTTHAAARAAL<br>AALPTAAALLQEIQHGLSKVLQDWDKRFTEAFHSFETETARSVSKKDDTVLQYGNRI<br>LSLKDALYSIQFSKHTQQTKWQDVAQQHAMSALKELEETVPLFAKAQRDFEKTD<br>ETRYDQYLVNIALTDEVNALAMRAQRVRRHNSALESRCSDVDRVLGVVDSQSLV<br>LEVITKRAHQLDDELTLGGRSY                                                                                                                                                                                                                                                                                                                                                                                                                                     |
| Saccharo-<br>myces<br>cerevisiae       | Fungi              | tr E7Q5J4                  | MRKRMAPLNLPESHGAKSDEKDSXSSKPAFSFGAKPDEKKNDEXSKPAFSFGA<br>KANEEKESDESASFSGSXTGKEEGDGTAAIISFGAKPEEQKSDTSPAPFTFG<br>AQKDNKTEESSTGKSTADVSSDSLKLSKPVLEKPVSLDNKTLDDLVTWKGWNI<br>LTESASHFEQYTKINSWDQVLVKGGEQISQLYSDAVMAEHSQNKIDQSLQYIERQQ<br>DELENLDFNETKTEALLSDVVSTSSGAAANNNDQKRXQAYKTAQTLDENLSSLS<br>NLSLIVEINNVSNTFNKTTNIDINNEDENIQIKILNSHFALRSLDDNSTSLEKQINSIK<br>K                                                                                                                                                                                                                                                                                                                                       |
| Schizo-<br>saccharo-<br>myces<br>pombe | Fungi              | sp Q10168                  | MSFNPGNNQNSGFSFGKPAQPNSAAQGAATPAATGLFGNTNNTSSTAPSGGLFG<br>SNNASNTSAPSTFSFGKAAATGNSTNASTSSPFGSTNTNNTAGAKPLFGGLGST<br>GSANSTGDKSKNTASSATGAATNPSGSTFNFGSSNNSFNFGKPASTNTTTPAAA<br>STGSLFGKPAATGTTSNAPPASSTTTPATGSGGFSFGKPAASLSTNNASTSTAN<br>SGFSFGKPAATTSAPGSNTTTPSSITGTNDSKPAASNTGSAPTTGFSGFKPAGGA<br>ASTATDKGTTTTSSAGTGFSGKPAATTEDTNKPTAPNSAFTKPAATSTGDNKPTFSFG<br>NTSKPTENTSTTASAPLNNKPAEGANQTSFGSFGKPAATTTSTSKTGPLFG<br>NKPADPSAKPGATSTTPEPPPSIKHKLQLEILNKWSTDLTQTQTEVFNKLDQVVS<br>DWDRTLVDNGALISKLYTETVEAEQMSNRIDDGLEIVSSSQQLFKLLDSYETQLET<br>FDGRATSALNVERERAFVADDILSRLDRLGEDLGTVINQMDFSKPDDSSIEIVKVL<br>NAQLASLGVWENRIFQMEELDKTIKKNSDVLF                                                            |
| Aspergillus<br>flavus                  | Fungi              | tr B8NLM8                  | MFGTSSATGGQGSTLFGGATGSAATPSSGTTAFSGTQSKPAGTTQAPSLFGSGS<br>QTPKTNETPSSGQTPAGGLFNAAKPAGGLFANATSTPGQSGGSIFGNASTTTPAG<br>PPPQGGATGQPSLFGQTAQKPGGLFGNVNTTSSSTPTTATAPSTNPLFGGAP<br>QTQTQSGNGGGLFGSNTQNTQQKPLFGSTPAAPAGGNLFGNANKPAESTTPTTSA<br>DTAPKPLFGAAPTSTGGTTSAQTPSLFQKPAAGTDSAPKPAFSLGTTNTSAPQST<br>PAASSATPQKSLFPAIGGTTSTTPTTAAAPSGGMFSAALGAAPKPTGTTAPSTTAT<br>APPATQPAAPTGGGLFGKPAAGTTASSOPSTTATPAAATDASKPSLTPSAPATSTA<br>TGTTGATATSNAAAGGALGASTAGTPPAQSRLLKNTKMTDEIITRWATDLTKYQKDF<br>KEQAEKVAEWDRLMVENGTQVQLYGVSTVDAERATQEVERQLASVEGQEQEELS<br>WLDRYREVDEMMSKQVGPESLQGGPDQERERTYKLAELSERLDEMKGDLTSMI<br>EEVNGASATLSKTNKADEPISQVIRILNSHLSQLQVIDQGTSELQTKVSAQKAGQSL<br>SSRFYGFSSGGMANSTAAADDFYRSYMGRR |

|                          |         |               |                                                                                                                                                                                                                                                                                                                                                                                                                                                                                                                                                                                                                                                                                                                                                                                                                                                                                            |
|--------------------------|---------|---------------|--------------------------------------------------------------------------------------------------------------------------------------------------------------------------------------------------------------------------------------------------------------------------------------------------------------------------------------------------------------------------------------------------------------------------------------------------------------------------------------------------------------------------------------------------------------------------------------------------------------------------------------------------------------------------------------------------------------------------------------------------------------------------------------------------------------------------------------------------------------------------------------------|
| Tuber melano-sporum      | Fungi   | tr D5GKM5     | MSNPPVSGTGSSGLLSTNTSGSSSFAPSTNTSVNSGTSTFSGFIAASGATSGPPS<br>GGLPFGGAASGASTPKPTFGGNSNPNPSSGGPLFSAQSATPTSAPAPGGFLGNKPSG<br>GGFLGVQTTPSGGPFSSGASTTTPAGPPPGSAPKNLFGGNGPFGGGQNASQPSG<br>SSGGLFGGSSQASQASKPLFGTSATAAAAPLSSGFLFGSTPAAAASGGMFDGAQ<br>AQQAASSSASAAGGPAEQKPGGPFSSGAGPSTTPASKPPTSGFFVPPSSSATPTA<br>PAGTAPQASMFAGAPASTTPAFAFGATPAKDGASQSSAPNLFGNLASGTAFPSASSA<br>PANPSSSSGTGVPFFGATAASTGTSTPPLFGSASKPPGAPASSAPPTPGGLFGKP<br>PATSGPATSTATTASAAPNSAPSGLFGGTTAATSAAQSPPTPVGTAGAAAGSSQSA<br>NAPGASIPGATMLPPPQSRKLNKSMEEIINRWTSLEKYKAEFVQQADDIKKWDLSIL<br>ENGEKITNLSETLEAEKTRGMRDVLQQLLESQDEELGTALDYEAQIKLDFEAQMG<br>GVEGMQPADQEREKAYHLAEKLNQDLQAGMGNELGGMKEINKASTTINKTINADDP<br>LSQIVKILNDHLSLQWIDSHNTSMAEKINEAQKKARDGAGGALGGDEYFPPSSSYR<br>SMR                                                                                                                                             |
| Dactylellina haptotyla   | Fungi   | tr S8AEG1     | MSGNQSGGGLFSGASGGSIFGSSSTTGTSGGGFFGNTPTAGSKTGNMFGSSETPS<br>QGAPSGTLFGSTTAPAGSSSIFGKSTGSMFGASTNTPGASTPTGSSAAPSFLGG<br>ASAPGPKSTATSNFSFGSTQAATPAGSATPTQSGMTASNLFGSTTPAPNKLFLAGT<br>GSGNMFAGSTTTPAAPASLSSGIFGASTGAAPSDANKPSTAGLFGTSSSNLFG<br>GASTTSRPNLTPSSSTTGLFSAGSTGAATPGSSSLFGSQPTGADASKPASTPSLF<br>GAASTGAGPMFAGKASSTPAPSGTATPSSGNLFGSGSTTGGFFGQANATSGTVT<br>PSAIFGARPTDTKPPVVALFGSDASKLAAPAGVPTETSKPFLFGTGTVASSETQPK<br>GLFAGTTPQPLGPVTTSAETQKPAALAGNLFAGATAVATKPSGLFAGAPAG<br>AGLFGGGGATPTSATATRPPAANLFSATPTTGAASSTGQAGSLFGAAAPASVTAAT<br>APAATAAPSLFGAKPTDKPTTATTSAASGSPFGAGPAAAASSTAPLSATTVTPTS<br>ATTAPSLFGGKPPAPATAAATAAATAAALTTAASGTTAPAPVGSTPAQPSRLKKNK<br>SLDEMIRWTSDLKYTAEFNKQATEIAGWDRMLVNVGDKLVELHTEIKATKQED<br>INKALDYVIGQDELSAALELYEKQVDDIFQTIQGGPEGMQPADQEREKSYLLAEKL<br>DKQLDIMSKNLNIITDINNATNTINKTSSAEDPLATIVKILNHLGALQEIDVRSNTLQ<br>GKIDAAKTQRDASMSNGLGGQDMNDFASQAFRGM |
| Crypto-coccus neoformans | Fungi   | tr F5HD88     | MAAPNPFAGFSGKQPSASGTSFLGNTSSQPASGGLFGSSSTTNSSATPAASG<br>GGLFGGGAQTSGLLGNNTTGANNNNNNSNAAAAANSSTPAAPSGGSLFGGFGTG<br>GFGTNTATGSTTPASKPAFGGFGQSTTTPAAPPPASTGTSLFGGAATGTSTGGGLF<br>GAKPAEAGTGAPGAASSTGGFTGFAKPAAGTTSAPATGGLFGSKPAESTPAASSPA<br>PSSGGGLFSGAKPASTTTPAAPSLFGSAPAKDASSSTPTSGTPTTSGGGPFGG<br>GLFGAKPAPATEAPKADTATTAPAAPTSGLFGGAGASKPAEAPKPAAGGFSFGLN<br>GAKPATPTTEAPKTTGGFSFGASAPSADKDEMPAEAPKTTGGFSFGAPAAAASNEE<br>KKTDKPAEAPKGGFSFGNIGTSATTASGDDKGAPEAPKAGGFSFGGLGAKTDGD<br>KDKAPAAPTPAAPAGGLFGAKPADAGQSSAAPSASGGLFGANPNTTAAASTTTP<br>AVPTAPIASAPANVEKPEPVPNLLRGKALDDIVEGWNKLEEQVKEFERQAGEVRE<br>WDKILVRNGNITALLRQVLEAQQTQAAVDEPLNYFEAQQNQLESMLDVYKEIEKAI<br>MSNDSTRPLAAMPADREKAYTLAEDLNKQLDDLSRNLQMIQVKNKISTSSQSL<br>DASTSSLNRPSTPSASAADAASQMPDDPVLSLSAILGALRALSSIDSSAGKLSK<br>VGELETKMGSSGSARGWGLPRR                                                                             |
| Wallemia sebi            | Fungi   | tr I4Y5A2     | MCNWIQFCCKHIQTNPLATPSQSSGFNFGAQTPAKPNTPAFNGQSTTTPAAPPPNT<br>GGFSFGTGSSGFAFGKPAATPGAQTAQAPAPSGGLFGSSSTTTPAAPKPTGG<br>FNFGGSSFGAQGGGTGLFGASKPAENSTTTPAPASGGSFSGAKPAEAPKPA<br>GGLFGGGLGAKPEEKKEEAPKAGGFTFGASKPEEKKEAPKTSLFGGAGGG<br>SAPAAPKPAESAPKPAFLGGGFGAPKPEEKKEEAPKAGGFAFGNTLGSKPEEK<br>KDEAPKPAAGGFTFNLGGAEKKDEAPKPTAGTSTGGFGLGGFAGKPEKQKPT<br>KPSGGFAFGGTAAPKPEEKDEAPKAGGFSFGSASKPDDKDEAAKPAAGGFS<br>LGLGASKPEEKKEEAPKAGGFSFGGAASKPEEKKDTTSTFQGGGQDKKDP<br>LSVALGKSSANAEPKAPTSLRNKTLDEITQRWTELENOQKDFRRLGNEVKE<br>WDGVLDRDIAEQISRLYNQTVSAEQQLAVDQSLDYIESQKELDEVLTRYKEEEL<br>FDGDSNLQLQGVADNEREKSYRLAENVNEQLDDLRLNLSMIDEVNLSSGKTKSK<br>DNEEDAQQDVIAQIAAILNAHLSLQWIDGTSDDLMEVRLDGVVNIQKSKTYTP<br>NTSTATPLQSSRRGRGGFLSTLSNV                                                                                                                                                               |
| Puccinia graminis        | Fungi   | tr E3JYJ6     | MGDANKSNPAPLFGSSSSTLFGSQAGKPAATFGGGTSPFGASQAATSTTPQSTP<br>TKSSTPFFNFIAPGNSNPGGASGNTNAPTSLSLFGGNTIGAASSAPKSFIGNPNTAP<br>GTTSSAAPSIFGGNSTSNTSNIFGGSSSNTSNIFGGNSNPTPATSTSNQSTAT<br>PAPASKPSLFGNTTGTSMSTSNLFGTTPAANSASGAPASTTTSTTFAFGGPPANOPK<br>DANKSESLFGGLQTPKAPSTSPSLFGAKPADSSTSNPQASVNNNPAAGSATPA<br>TTAAASPFLFAPKPSSTSDLPKAPSTSPFGNMNNSALTIKSTAPVKSSPLAMNS<br>STTEGSOANKSATPKPAGTPPATPSTKPNMNLAPSLKKGKLELDLVARVNELE<br>RVEDFKHTANEIAAWDQVLIQNGDQISMLYDELQIQIEPMQSSIDQTLDYVETQQEL<br>SVALLDYERQLSGSQADFSASSTGRTRTAAQEREAYKTAEEVHVQLNDMAGEIT<br>GTWIAELNSLAGPGRIDESSLADGTTSSGSSNEDPVIQIAGILNAHLGSLNWIGEIT<br>QELGVKVNESRSVNTKVEFGLPESLNHYRQIEFNSDEFNPNLSATVGPSTSLNS<br>GFGNRPISGLLSHPRR                                                                                                                                                                                                    |
| Homo sapiens             | Metazoa | sp P37198     | MSGFNFGGTGAPTGGFTFGTAKATTTTTPATGFSFSTSGTGGFNGFAPQATSTPS<br>TGLFSLATQTPATQTTGFTFGTATLASSGTTGFLGIGASKLNLNTAATPAMANPSG<br>FGLGSSNLNNAISSTVTSOQTAPTGFVFGPSTTSVAPATTSGGFSFGGTAQPSG<br>FNIGSAGNSAQTPATLPTFPATPAATAGATQPAAPTPTATITSTGSLFASATAP<br>TSSATGLSLCTPVTAGAPTAGTQGFSLKAPGAASGTSSTTSTAATATATTTSSS<br>TTGFALNLKPLAPAGIPSNATAAVTAPPGPAAAAGAAASSAMTYAQLESINKWVLE<br>LEDQERHFLQATQVNAWDRTLIENGKITSLHREVEKVKLDQKRLDQELDIFLSQ<br>KELEDLSPLEELVKEGSGTIIYQHADEEREKTYKLAENIDAQLKRMADQLKDIEHLN<br>TSGAPADTSDPLQKICKILNAHMSLQWIDQNSALLQQRKVEEVTKVCEGRRKEQER<br>SFRITFD                                                                                                                                                                                                                                                                                                                                |
| Hymeno-lepis microstoma  | Metazoa | NCBI CDS30516 | MSGFSFGTPTTQAGAKPTGLNLSFGNTQAPNNSAPSFSGSPSNTSVNPAKPAFP<br>FVTSAPSGSVTASQPAFGSSSNKTSAQSTPFFALSNSNTAATSTSSLSL<br>PTTITTSSTGFDGNSKSTNLFSVTSAAAAAATTTSTASSSGFSGLTSSQPS<br>TAISTTSTVTSAGSTTSLTFGTQKTGIALTTTTSLSTSAFPGPFLGNLVTKPSDSSAA<br>VNSSTLAPASAVSQSPAPSTYTYRQLEELVNWVTEYLEDQSRNFESELCLRNKADA<br>LLIANADKISDLHAKVEACKAGQYRIDQLEFVESQQRALDLEPLEQAVSDLLPSQ<br>QHADAEREAIQMCINTDLELQQLSELREMAERVAVNAVTAELPEGIESHPSSNST<br>STSDNLDKNNVIGQLAQSEYTRAYGKNEDLRRAYRHGENCVYAATTEKVLTPIRR<br>VLCNQSVAVRVFNADGQYCLTAGGNRTIRLWNPEVGRLLKYTGHHGGEVSDVQA<br>ASDSSLIGSGGADTLVVLVDVATGQSLRRWRKHAGRVNVAVFAGPAAAEGLAPS<br>SSLLFSVGDGMLFAWDARARTPYPIQTMHEAKDSVNLCTVRRVHIITGSVDRVC<br>RVYDVRKIMTEDYIGSPVTSVGLSFDNQCLLVAQSQSVVRLFDYLNGLNRYTGH<br>VYKDYRIDCCLLNDDAQISGSEDSNCRVVMVNLADGAADTTSVLDHSPCLAWSS<br>DIGDSGSKTEKLTIHVPFIIHLSLPHPSKNALLTAGGDYFVWLWSDTKEENDYFCLSFK<br>RYFEDR                                   |

|                          |         |           |                                                                                                                                                                                                                                                                                                                                                                                                                                                                                                                                                                                                                                                                                                                                                               |
|--------------------------|---------|-----------|---------------------------------------------------------------------------------------------------------------------------------------------------------------------------------------------------------------------------------------------------------------------------------------------------------------------------------------------------------------------------------------------------------------------------------------------------------------------------------------------------------------------------------------------------------------------------------------------------------------------------------------------------------------------------------------------------------------------------------------------------------------|
| Hydra vulgaris           | Metazoa | tr T2MGFO | MAYSFGTKPTTSTGFNFGTSATPAVXFSLGSGSTQPPSFTTPASQSSATSGGFSFG<br>GPSVQSTSLTGFSFGESKPAANSXLGNQPSDASKQPVFSGFSTATTTKPTS<br>NITFGSNLSANSSFTAISTNAGIPASSAGGFSAPGSTKFLSLTPNSGFLPALSTGVS<br>LPASNVGFLPASTTGFSLPASTGFSAGSSSQPGGFNFGTPASSTLSFGVSIPINTT<br>SSTLLSGFNLSKSSASDLDLKTVPSSNSLFSGATMPLSSVATTNLSNSNALPLF<br>SGLSSSSASAPLFGSSAATSVPFTGLNSTTSSVAGLPAVSTTTISAPSVKMSY<br>KELEETVDKWLHDLGEQEKSFLNQAQVNIWQKLDNNGEKITALHNEVERIKAEQH<br>RLDRELDLILSQEELIEELVPIEEQIKLQPINQSTQHTDIEREQTYRLAESIDSQLKRM<br>MDLSDVIDHINMANIEPVKGRDESMQIAKILNAHMDSLQWLDQNTSQLQRRVDE<br>VNQALDTRKREHERTFRYE                                                                                                                                                                                        |
| Ciona intestinalis       | Metazoa | tr F6THX7 | PSNAFFSGQTSAAPATTNTGFSFGGGGNNNTGFGGGIGTTGKVLNIMQRCMNT<br>CQSSSLFGSSTPATQSTGFSFAPVASTATGGSQVTSAGSGLFGSTSGFGFASSTK<br>PSSQANPSALLNFGSTTTTAAATKSMFGLATQAPSTPATGFSQPAQATGLASKPVSL<br>GGVATTAQPVQQTASTGFLTQPAKTDGFLGGLSSGFLGGLTSSVATTTPAAS<br>GFQLGSTAGTSGSVSAAAPFLSSALASSTNAOQKPAATAATTTAAPPGLSLGG<br>AAATSSSLGGGKILPGATAATTTTAAAPSLRYKDETRINKWNELEQQEQLFLT<br>QATQVNAWDKLLIDNGEKITNLNSEFEKVKCDQDRLDQDEIFIRTOQQELEDLPLE<br>EKTRQQVSSLAGAVHTHADVERERTYNLAENIDAQLKQMVQDLKEVIEHINATSQP<br>ADAADPNQISKILSAHMDSLQWLDNSNGALQQKLVNVEKNAHVKEQESRFRLA<br>FD                                                                                                                                                                                                                |
| Crassostrea gigas        | Metazoa | tr K1R138 | MSYNSMLKHTNCGCAVTPHAITPIRFHTMRHAPASSSTSTPLGGGFSFGQKPA<br>CQSSSLFGSSTPATQSTGFSFAPVASTATGGSQVTSAGSGLFGSTSGFGFASSTK<br>TOPNAPASTGTQLGGLAGFAMGKMPASIGTPAAAPV GASAPPTGTGLTGLATLG<br>TAGAGFSLGQPAATKPVGISLGTQATSTAGTGLTGLTAASTTITGNPLGTASSG<br>GGITFTGQKTTAAPTGLSLGGATTAASTTQSTLGFPTVAAATSSAVSSAAGVTVAA<br>ASAGSKMSYQOLEENINKWMELEKQEQQDFLELATQVNAWDRLLVENGKAITLNS<br>DMERVKVDQKLDYELDFIHSQQRELEELLAPLEKAVEQQPNINIQHSALERENTY<br>QLAENIDAQLKRLMSDLKEIIDHLNNSNINQDQTDPIQKITLNSHMDSLQWIDQNT<br>LLGRKVDDEISKQMEVQKREQERNFRVLYN                                                                                                                                                                                                                                         |
| Drosophila melanogaster  | Metazoa | tr Q7JXF5 | MVFLQPTTAAPTGGATSSFSFGLSTGTPAAAPASGAATAPATKTTFSFGTPA<br>GIGGGDADNSKAQAPPAFGFLGSGTASAPLTLGTAQANPASTTSATATGTSAP<br>PAFGGFTAQPAASVPTIATSAPNTAATTTGLLGGSGLGAPKTTAAASTLTAAPSAI<br>ASTOGAAPAPTSTGGAFANLTTEKTTDSSAVSTASQLSYHQLEEHINKWLEEFEE<br>QEKVFEQATQINAWDKLLISNNGKIVELNDAVKVKVTDQOVLQDELEFIATQOKELE<br>DSLGPLEKEFVNLPRVDMERSQTYLMEVNDTLQKQMSDELKEIIDNLNEANKGQDT<br>TDPIIQIKILNAHMNSLQWIESQSTNISKLEEDIGIKIQDSQKRDIFRAPP                                                                                                                                                                                                                                                                                                                                          |
| Amphimedon queenslandica | Metazoa | tr I1GJ55 | MNVGGGLGQGGGGGLGNRFQFPVSPQGGGLGAGLRGIGQTLQMGQGGQTGL<br>TGLTLNRPOLGQPIRPTGQMLTGQHLGQTLGLTGLTSPQTLGLTGLTGLTGLT<br>PQAGLTLGLTTPQTGLTGLTGLTGLTGLTGLTGLTGLTGLTGLTGLTGLTGLT<br>GITDLAGLTSQPQTGLTGLAGLTSQPQTGLTGLAGLKSQPQTGPTGLMGLTSGSQ<br>GLTNGPQTGLTGLTGLTGLTGLTGLTGLTGLTGLTGLTGLTGLTGLTGLTGLTGL<br>MKPTGISHPITGLAGLTSQPSTGLTGLTGLTGLTGLTGLTGLTGLTGLTGLTGLT<br>SQPVTGLTATSTQARTGLPTGLTGLTGLTGLTGLTGLTGLTGLTGLTGLTGLTGLT<br>SGLPSYGTATGLTANPPVTLAASAVTSTGPTTEAPVKYTYKLESIDQWRSRDL<br>NQRIFMQQSQVLVQWDTMLQRNGDRIITLHDQVDKLDKQKLDSELDLIDGTQK<br>DLEELSQLETLGQQQQTQLTESQHPDIERNRIYELVKRIDSQNSMGHDLKDVIEQM<br>NAEGMQEEDSEVFQIILNAHTDSLNNVDRNTAILQEKMYIAQLTEQHRMEQERS<br>FHLHY                                                                                           |
| Helobdella robusta       | Metazoa | tr T1G5P4 | MPTPTSTTTTTSTVGGFNLAASLAATTPASSASQPLPLLSIPQSSASATASSSS<br>VAATSTTTTATLSATASTVISSSTTYSQLEDLQKWTTEQEQEKLFLHQATFVNA<br>WDRVLMENGEKITLNLNLDLEKMKMDQSRLEDLDFVLGQQNELEIKLEEKVGS<br>LQKPGQYVVAHADIERDQIYLAESTDQGLKVLSSKLEIHDHINVEGGDDNDNDI<br>RQISKILNAHTSLQWIDRNTGMYVCMYVCMYVCMYVCMYVCMYVCMYVCMYVCMY<br>MYVCMYVCMYVCMYVCMYVCMYVCMYVCMYVCMYVCMYVCMYVCMYVCMYVCMYV<br>VCV                                                                                                                                                                                                                                                                                                                                                                                              |
| Schistosoma mansoni      | Metazoa | tr G4LWN8 | MPDGLGSSSGLKLSNMSGFSFGKPAATSAFAGSSPFGTSAGTKPTFGVSTSTSL<br>FSPAVASSNTAVCSSLLQNSPSSLTSTSGFGTVATTSNAGLSSSFASLAKPSTTV<br>STFGTSSITGLTNSLPTSQSALNQPSVNLPLSLKPAATTTSNVGSSTFTGLTIAIS<br>TQSTVTPPIISFGLTSSSTVSTGAPTASIVNVHASQAPAISSIGFVSSASLSSAITA<br>ATIAMTSYFNPNLSTLAKSAAASGFGTSSLGIATRILGETATTAIAITSLCATIATT<br>TTSIPSAITSSSVTSSQTLTYNQLLELVNKWTLLEEQERYFFDEADRINQWDT<br>LICNAENITAMYKVMCQEQSRLEQELDFIEGQQRLESLELEPLERAVNELPPGQ<br>LHSDYEREAIFQLATNVDELGQLLTDLREIADQNTTTMNVTTGFNSSDNSTTTNA<br>TKENTMINGNKLTSNNNDIMNQITRILNCHMHSNLNWHHNTQEIMDRKLVNGVS                                                                                                                                                                                                               |
| Arabidopsis thaliana     | Plantae | sp Q8L7F7 | MSGFFGQSNVGGFSFGSSATNSSASSTTSPLSFNFQSSNPSTGFGFGSS<br>VSSTPASSTTSPFGFASSTPSPFGSSASSTPSPFGSSASVTPASTTSPFGFGT<br>AASSAPAPSLFGSSTNASSAAGSSPFGFVSSASSTATPSSSLFGAPASSAATP<br>SSSPFGAAPASGTPPLFGSSPFLSAPSSASANSLFGASSAATSTSPFLGAPSS<br>ATGATPFSVASSAPGSSSIFGATGSSPFSVASSASGSSPSIFGATGSSPFGSS<br>SSAGSTPSLFASSSGATTSSPSPFVSTFNSSTNTSNASAPPSASTGFSFLKS<br>TASSTTSTPAPPQTASSSSSFSGTANSNGFNLSGSSAASPSTSGAVFSIATT<br>TTSSSTPAATSAPASSAPASTMAFFSFGVTSATNTTPASSAATFSTTGFGLASST<br>PATGSTNSFTGFAVPKSTSPASSSQPQTSPAFSFLPSSTSTTAPATSSATTTQTL<br>VVPSSGTTAVAPVAGSPKLPSEITGKTVIEIKWNTLEQERTGRFRKQANAIIEW<br>DKRILQNRDVLRLIEVAKVETQSSLERQLELIEHQEVDKALQSMEEEAERYN<br>DERKSLDDEAARDAMYEQSELVERELEHMTQIRSIQSNANQGGGELEAIDGM<br>SPLDVVVRILNQLSSLMWIDEKAEFSSRIQKIALQGGGGDRELMAPKHWMMS |
| Oryza sativa             | Plantae | tr B9EUR8 | MASLFFWCSPTTITAVASQAPKLPSEIVGKNVEQIIRDWNNELQDRATKFRKHATA<br>ISEWDRILQNRVLRILAEVAVKVVETQTSLEKQLELIEHQEVDKALQSMEEEAER<br>RVFQDERLLREDEAASARDTMFEQSETVENELOHMTQEQVKSIIQTLNATQGAEEFT<br>ADSMTPFDVAVRILDNQLRSLMWIDEKANEFSRIQRLPNNSAAAERDSGMPSRVH<br>WLQVSNCFNSLWLSDETRGFARYRSLLVPGVFRSVELKSRCYMMRWANEFSS<br>RIQRLPNNSAAAERDSGMPFRWLS                                                                                                                                                                                                                                                                                                                                                                                                                               |

|                         |               |           |                                                                                                                                                                                                                                                                                                                                                                                                                                                                                                                                                                                                                                                                                                                                                  |
|-------------------------|---------------|-----------|--------------------------------------------------------------------------------------------------------------------------------------------------------------------------------------------------------------------------------------------------------------------------------------------------------------------------------------------------------------------------------------------------------------------------------------------------------------------------------------------------------------------------------------------------------------------------------------------------------------------------------------------------------------------------------------------------------------------------------------------------|
| Amborella trichopoda    | Plantae       | tr W1PJM5 | MAGFSFTGNLSSSSSSSSSTTTTFSAQSSAPFSSSSSPSTFLPSSASPSS SAPAFSFGTSSSSSSSTFNPSASGFGAGSSSFSSSSSSSASPFAFFMGSS SASSSPSFGQNPSSAPSFSGSSALKPSSFAFSSSSSSPSSMASMAPATAV SSAGFDFFISSSSSPSPVAPATAGSSPNFGISVPATSSSTPAPFSFGPPSSAPATAK ALFGTPSSSSSTTTPSLASLSSSTLSSQFIFPSSSSSPPLFFPSSGASKLSSSTAS LTSSTGASSSSSPVLSGLPFLSSSSSLFSGSGLPSGTQSSPLSTSQNPSTSGTGFSF QKPAATPLGVSTASSSLSTGTAVPLTASSSLSTGTVVPLTSGAPSLMSSQTSAST SPALPFGFSSSSSSSSSVATPAIASATDSKIISTKTITTAITATTTNTSTTAASSTNL SSFLATKPPSSSSSLQTTSVVPSFSFVSTAASSTETGAKFSFASPNAGTTQQAAPFS QSSSAGIMSSKIITLQAPKPLSEITGKTVEEIIKDWNSLQERTAKFRKQAGAISEW DRRILQNRNVLIRLETELANVVERQHCLERQLELIETHQQEVDKALQSEIEEAERMYN NERGVLLEDEVASTRDSMYEQAEFIEREMEQMSEQIKSIQTLNNTQSSDLGDMDG MTPLDVVIRILNQLSSLMWIDEKAGEFSLRIKKLADHGAVERDLPGFLW |
| Physcomitrella patens   | Plantae       | tr A9SQI5 | MSGFTGFGTSSQSTPTAFSFGTSSAPAFGSTAAGSTPAAGSLFGSSAPSGFGA SPAASSGGGGSSTFGSTLFGGASSSSSLFGASPTPAFGTPSSQAAASAPSPSP FAFQSSATPSASSPAPSLFGASPPFGSTNAQSSATPAASSPFGASPSTGSAFS GFGGSGSSGFGGATPSSAASAAATAQSSGASSGFGASSLFGSKPATPAFGAM TPQFGASSSSTTPGFGASSAFSLSQSTPAATPSAPPFGFSGNITSPAPSFQFGA QSTPATTPAVSSAAATPFAGFSGSSAATAASATPSSAFGASTTTPSQPQASS SSLFGSSTFGSTTSSSAPSTSSSLFMSTPSTPFLPASTSATSSASASTLSFSS SITSAASSTTPASSGFGTSTPSSAASQASSTPSSGGFSGFAGAAPASSASGG FLSLLAKTSAASTPAVSATTTPTGFGMGTLGWSNLSAGPAAATPAATTTAATS TTTSTAASTAGTSEALTSTPARTPKPPSEIVGKTVEEIIKEWTHLQERTSKFRK QAEALGEWDRRIQNRNLKLESEVATVVEQSLSLERQLELIETHQQEVEKLESLEME EEAEKLYRDERPSLLEDEAAATRDMMEQAEFVERELERMGEQIKETIQNINAQGG DLDIAEGASPLDLVVRILNQLTSLWIDEKAGELSGRMQSFADQALLDKGHRGSR LRGA          |
| Volvox carteri          | Plantae       | tr D8U297 | MTAFKDVIFVLLVAEEHELLPCYAVLYTPCRPAATSAPAFGAPASAPSFAGSTTSF GSATPTPSVFGAPAAAAPTAAFGTAAAAPAAIGAPAAATSAFAGAPASATAFAAGT SAPAFGAPSTGLSFQPPAATGASLFGSTAAPAAATSGPAATGFPFGTAPGASSAA ASGGLFGAAPAGGSGGGVFGSTAAPAPAPAAAAPAGGFSFGGTAPAPAAAASAP AAGPAPAAAGATGFSFGGAATGASTGASLGGAAAGPPATSAAAFALGGLGGLAG TAPPAGAASSAPAFSFGGAAAPAGASSAAASGFLAPAAAASAAAGLFGTAPTT STAPATSTAAAGTAAAGPAGSAPAAAASAAAFSFGSAAAGTAPAAAAGTAAASAP ASSAAFPSAAGATAPAAAGTAAASAAAGTAPAGTAGALVPAGAAAAAAPASATQP LLPVSLKGNIEEIIINWNAELEEQVAAFNKHAASLSAWDRTHLHNRSCLLGVEEELG VVAAGQDALDRKLTMLETHHKEVHDALSSIEAEERMCIAERVLDDGDAERDRLY ARAEALSTALVRLGEDLGGVVADVNLGSAAGSDPSSALGAVVIRILNQLLALGQVE GRVSSLEQEVQALAGGEATSSAVSINSFRM                                                                           |
| Chlorella variabilis    | Plantae       | tr E1ZFL7 | MAGFGGFGGFGGFGAFGAPAAAASAPFGTPASSAGLSFGAATPAFAGFGAPSS AAAATPFGGAPASSAAAGLFGGAPASAAAAPAVGGFSFGAPASSAAAAPATFGF AVAASTPAAALASAAAGLFGGAPAAATGGFSFGGASSAAATGLSFAAPASAAAAT GLSFGTPASSAAAGLFGGAPASAAAATGLSFGAAPTAAATGGFSGFGAPAA ASSAAAAAGTSAPAFSASAPAAAASAAAAPATGAGFSFASAPAAAASAPAAASAA AASTPAFGGAASTPAAAASAPTAASAPVAGAPAAAGTTPVAALQAPSEVKKG PVDIINEWNAELEARSFVKHAEALAQWSSILSNRRALLEEELRRVRRQGES LEKQLQMLETHQKGIHDALVGMERGEERLYREERPLDDDSRERDRLYRAEKVGA LLSHLGEQLKEAIAADVNDSTSASLGDTAAPLKGAVRILNQLQALAQADARIEELSQR VADLHPN                                                                                                                                                                                                                              |
| Phytophthora parasitica | Stramenopiles | tr W2QHH4 | MSFNFGASSAAPSGGFNFGASSAAPAATSTPSTGGFSFGAASSAPATSTASSSGFS FGSKPAAAASSTSGFNFGATSTPAPAEAKSSATSAPSTGFSFGSTAPSTASPTSG AGSTGTSFGSFGAKTPAAEAKPATSSGFNFGATSTSEAKPATPASTGFSFGATSTT AEAKPAPASSGFSFGAKPAADAKPAEAKPATGFSFGASSASSAATSTTTTSTGG FSGAKPTTSTAESKTETPAVAFGTASSAAGSTTTATSTAAITAITAPATETDKPP AEYMGRTIEDIINAWSEQLERNADTFTTEAVKVKWDSLDMESQRKLGDIAGDVRRI QVAQNELDSNLDTIFAYQMEKSTLEQLEKSVDMKYESQDQMPVAADIEREQTLQL SVDIDDQLNMTTLKETVEKLNKAQDDVADDNPLVQIMKVLNVHHNSLQWIEGSA GRLNSDIAQLSRKLQDSSI                                                                                                                                                                                                                                                             |
| Albugo laibachii        | Stramenopiles | tr F0WL73 | MSGFQGTSNENKAAGSFNFGTGASVGSNPATNTLSTSSSFFKSPAVNTNTGTTG TDGNTSGFSFGNALNKSNGSRGMGFNFTGAGVKETNPSTSNNGADNKGFAGGF QPLYSKPTNLSFGSTADTSKNAASNVFGSSSSALSDAKASTAPGASAFSFGNATAS SDPNLKDENAAGSFSFQAARTGSDISFKSANTGDNKAESSVDASKTTTSGSAF SFGNTTASFKPTSDDTSKVGGFSFTSQPLNFTSTTSEKQDTTTTATTTQASTPSAA FSTSTNTPTTTTSSGTFSTTSSDALSNKTTSSNTPSTSTFNSGASEGKSSS AFSFGGVSPTSSVTSVSGSKTESTLQSNETSPIPAKFIGRVEEIIINMWSEQLERN AETFTKEAVKVCNWDMLMESQKLLGDIANDVRRIQVQKLELDVNLDTIFAYQNELN STLSELEQSVKMYESQDQMPIAADIEREQTLQLAVDIDDQLNLTDLTKETVESMN QAQRETMDDDNIPITQIKVLNVHHNSLRWIEDNSRRMNQINQLTKKSTLQ                                                                                                                                                                            |
| Saprolegnia diclina     | Stramenopiles | tr T0RJ07 | MSFNFGGAAGGATGFSFGNTASAAPAAAGATTGFSFGSTASAAPAAPSGAGTGFSGF GAATPAAASTTAPAASTGTFGGSAPAAASATSAAPATTGFAFGASATPAAASTTTP STGFAFGAPAAAPAAATEKPAFGAFGGTAPASMTPTAGFAFGGASTPAATADKP AASTGFSFGSSSTTAPATTSAAPATTGFSFGSSAAPTAAADAKAPASTGFSFG STPATDAKAPAAATGFSFGDAKPAATPAATGFSFGDAKPAATTTKAPAPGF SFGATADKPAATPAPATGFSFGASAVKAADDKPAAPSFSGDAKTTATTTTDAAKPA DASAATTTALPAEYKDKTVEEIIINMWSEQLENHAMAFTNEAVRVSHWDSLEMNQK KLGDLAIDVRRQLMAQKELNANLDTISAYQLELDSTLETLESSVDKLFENHRQIPDTA DIEREQGLQSVSDIDNQLSMMSTALKETIDRNLNLSQAQEDESANPMAQIKVLNVHH NSLWIDGNATKLATDMATIAKKLQ                                                                                                                                                                                              |
| Aphanomyces astaci      | Stramenopiles | tr W4GW85 | MSFNFGSAPAAAGGASGFSFGSAPAAAPATPTSGFAFGGAPAAPSSSTTAPTGG FSGASSAPAAAPTATTTAPATTGFAFGGAAAAPAASTTAPATTGFSFGGAPAAAPT STTTTAAFPFNFGGAPAAAPAAAPTTFGAFGGSSKTTTAAPTTAPASTTAPASTTG FAFGSSAAPSAAATTTSTPAAATGFGISSPTATTEVAPAFSLGGSTPAAAAAAPS TAFSFGGAAAKPTEATSSTDKPATSFSGGATATPSTTTTAPSSFAQPSDAAAATS GAAGTAVTLQDKPPAEYMDKTVEEIIINMWSEQLESHATAFTNEAVRVSHWDELTMQ NQTKLGLAIDVRRQLVAQKELNANLDTISYQTELESTLEQLESSVDKMFENRILP DAADLEREATLQLSVIDITQLNMMSTALKETIERLNQSSQAAGGGDDTDELHQPIAQ ILLKVLNVHHNSLWIDENATKLTQDMGEIAQKITRP                                                                                                                                                                                                                                        |







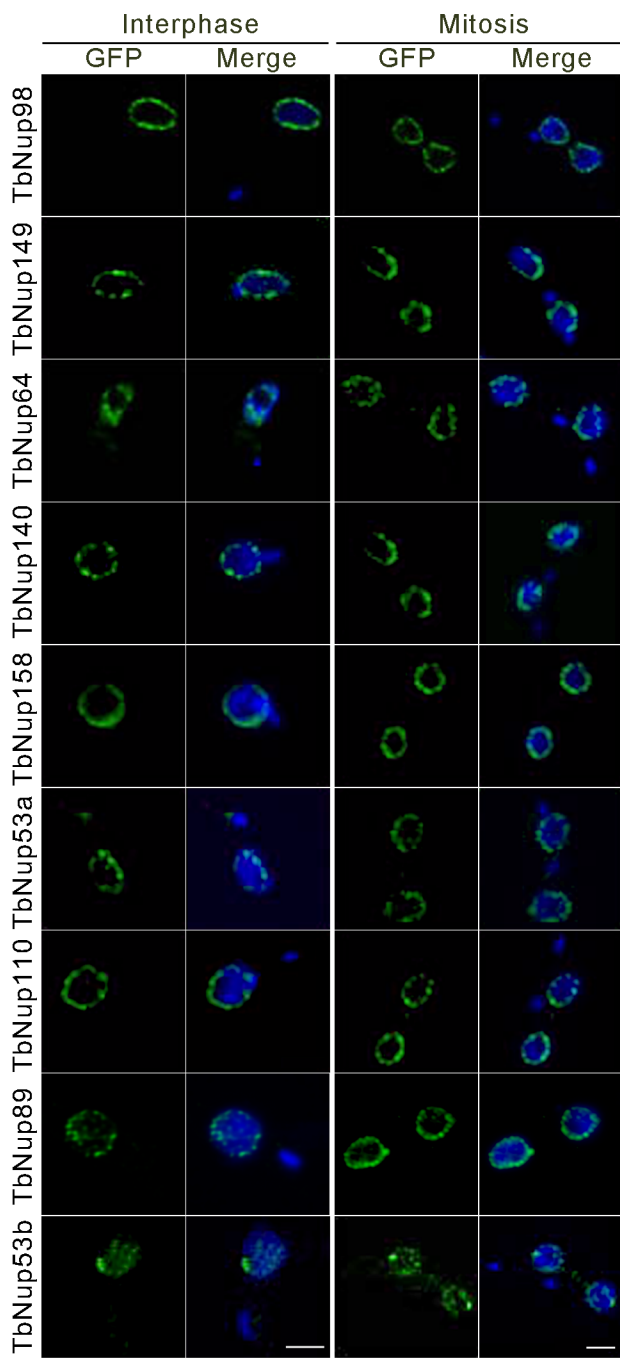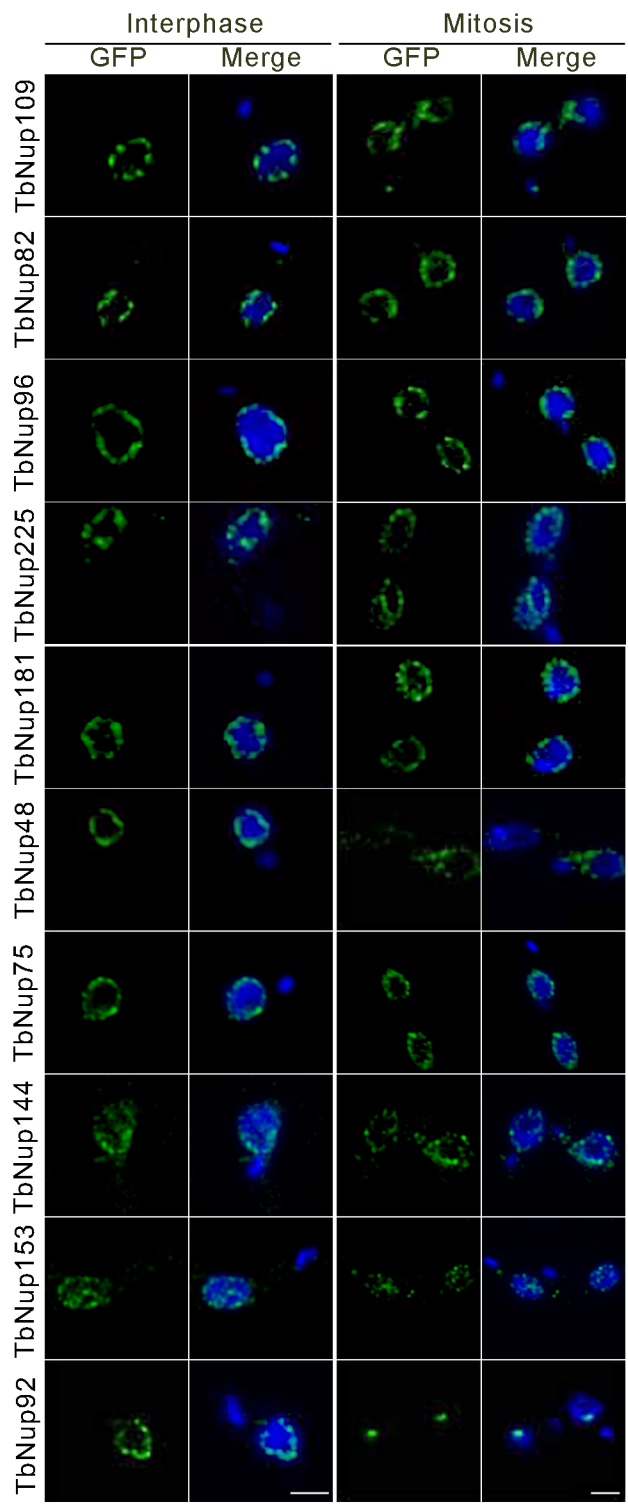

## Nup53b ortholog

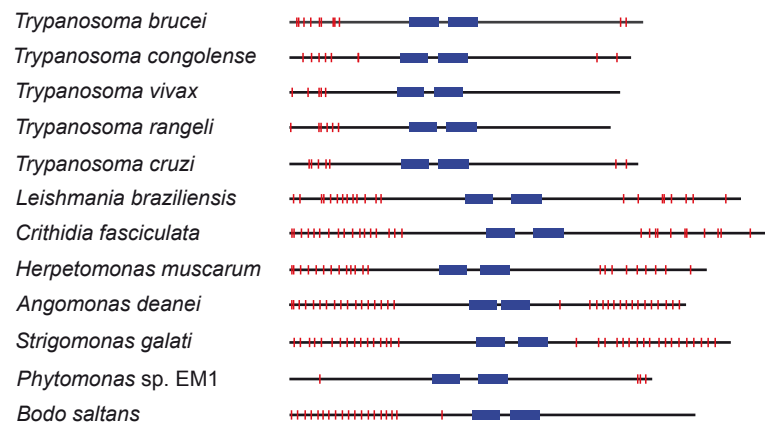

ScNup49/HsNup58/45

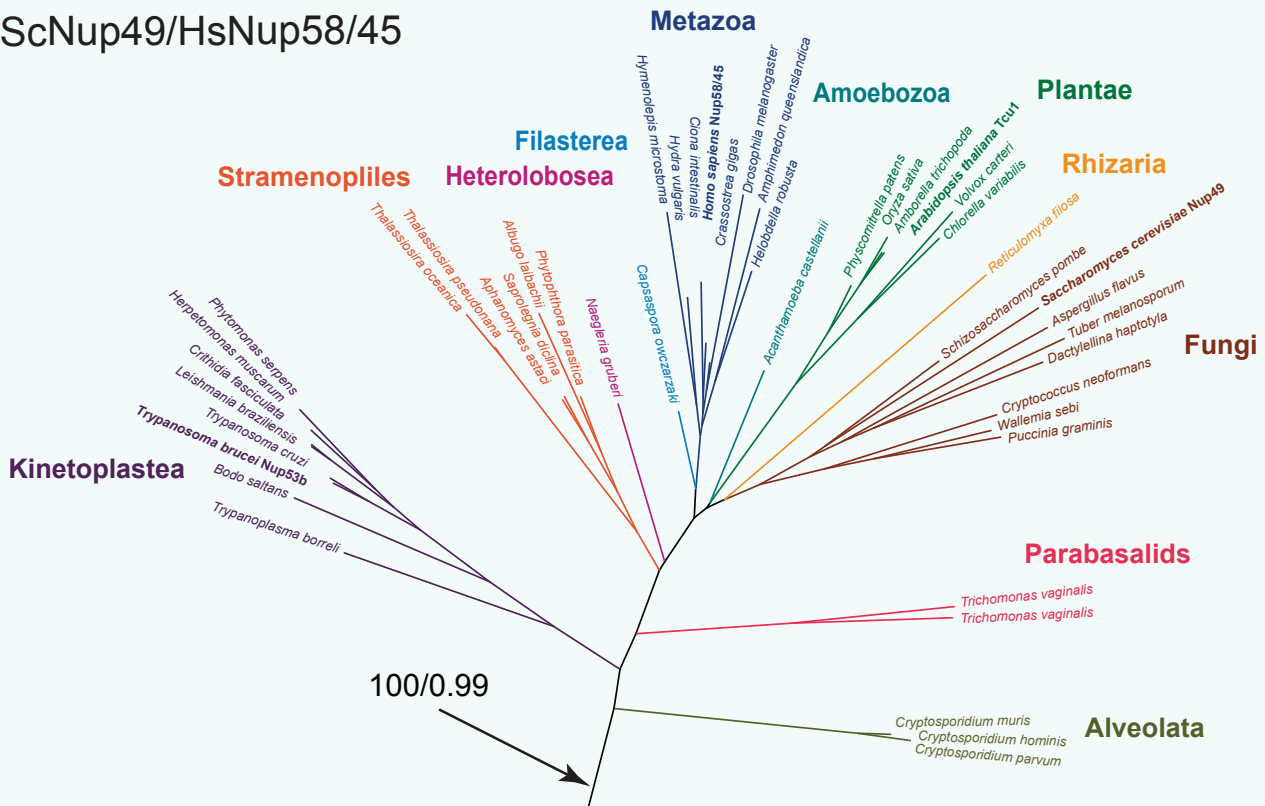

ScNsp1/HsNup62

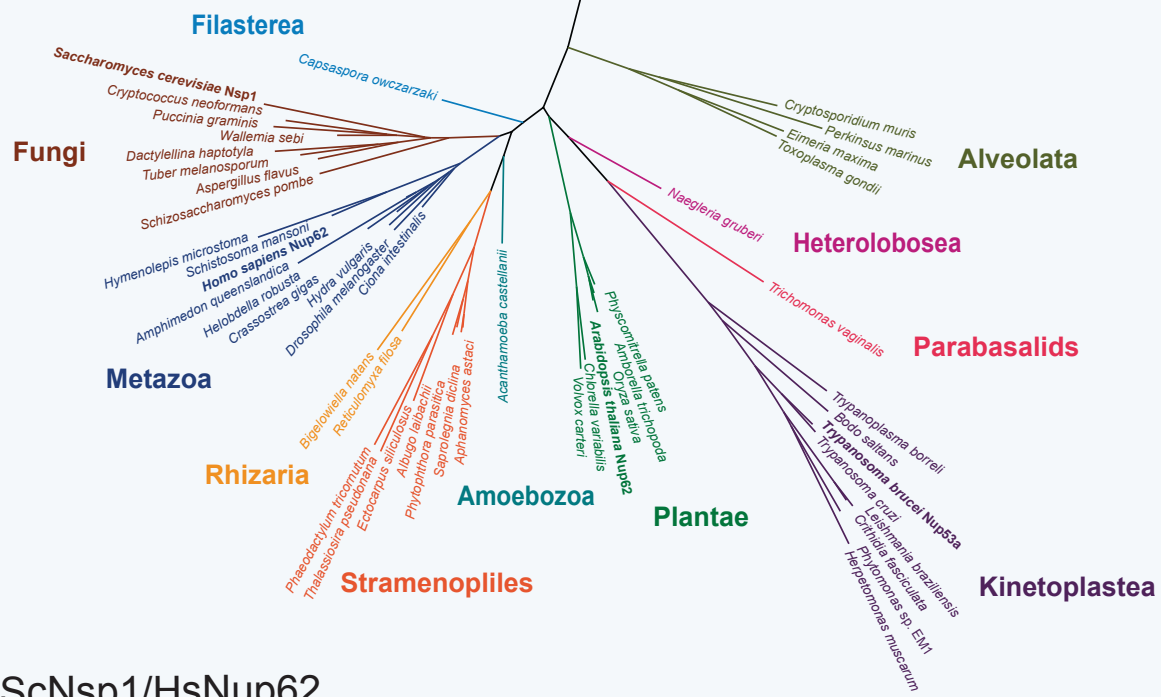

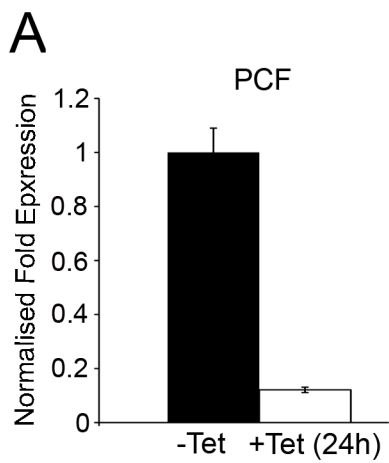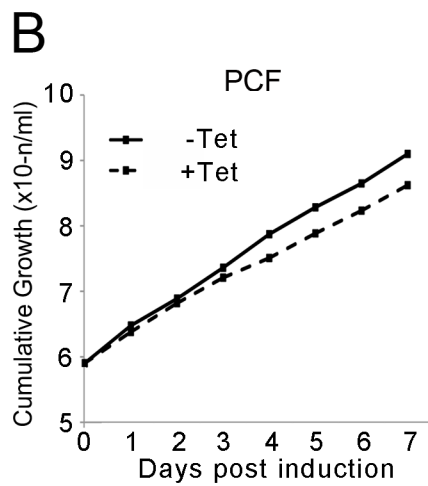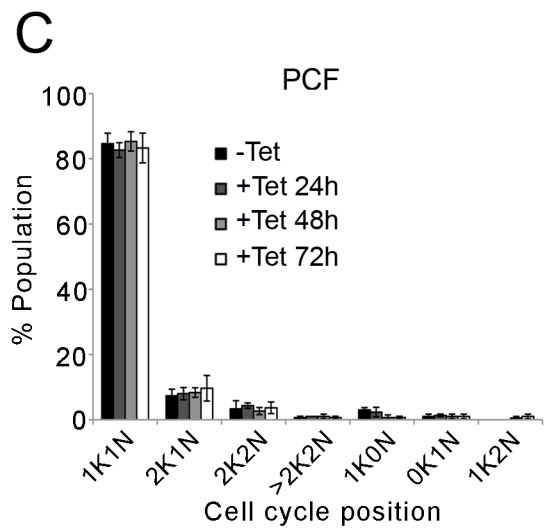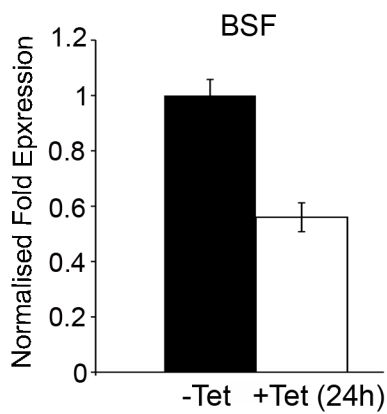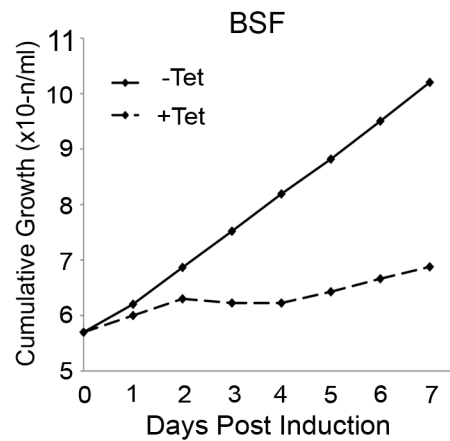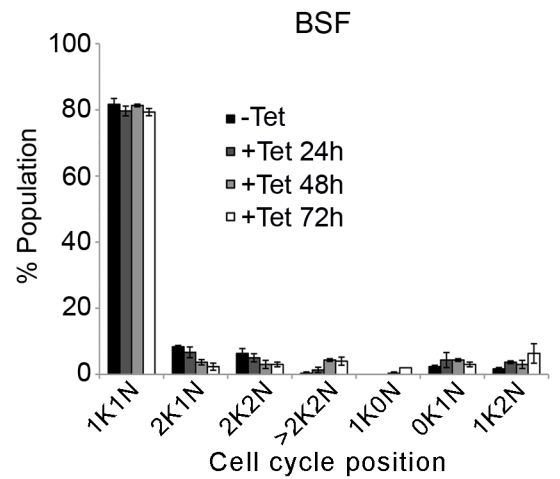

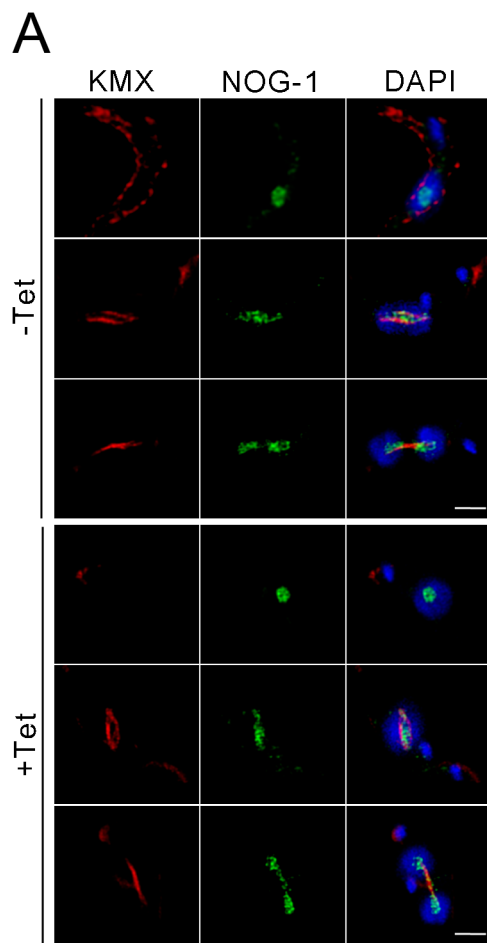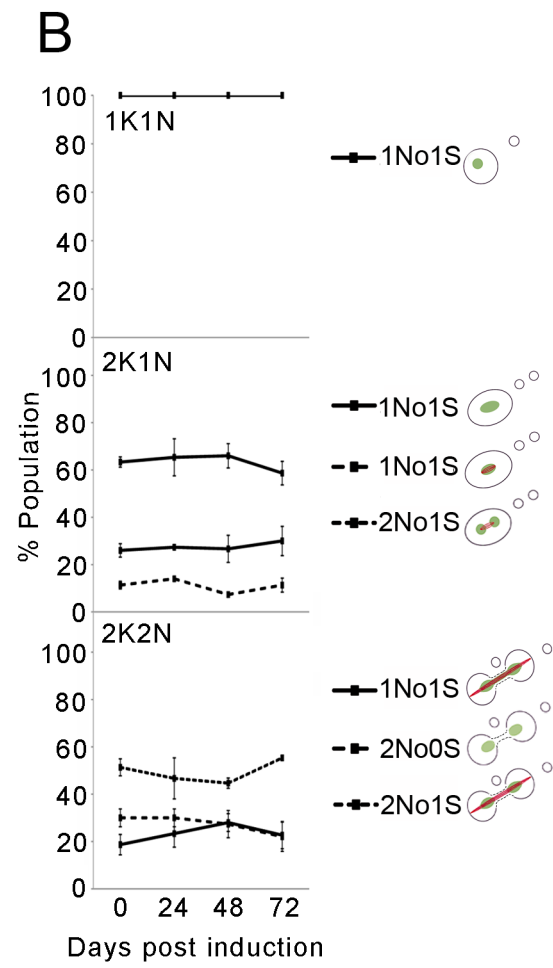

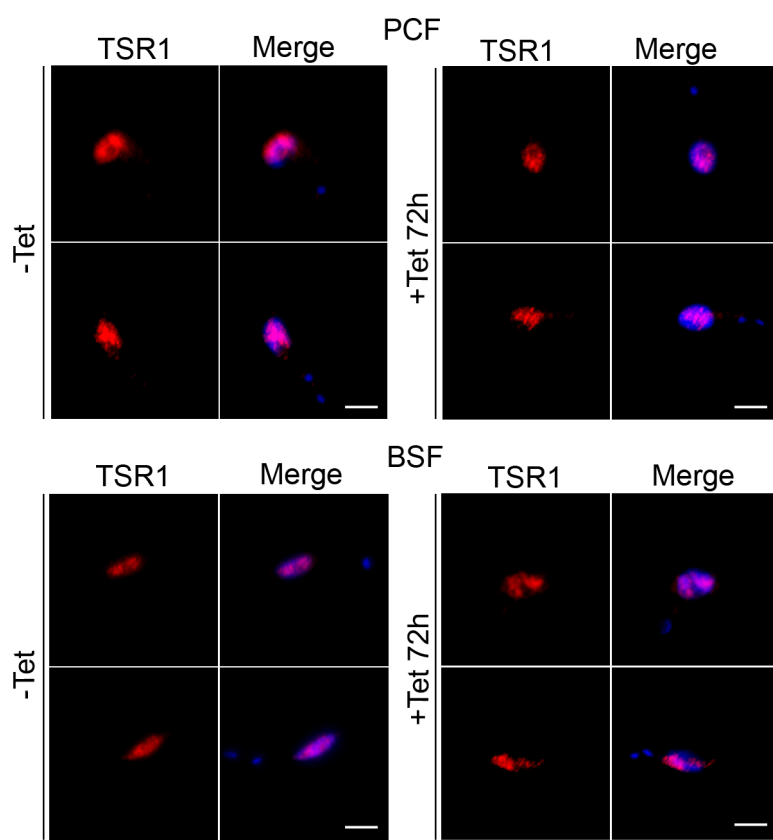

■ Genes on forward strand;  
■ Genes on reversed strand;

| Sequence       | Organism                                    | Chromosome | #Genes | Length  | Gene Locations |
|----------------|---------------------------------------------|------------|--------|---------|----------------|
| Tb427_10_v5    | <i>Trypanosoma brucei</i> Lister strain 427 | 10         | 19     | 4145152 |                |
| Tb427_03_v4    | <i>Trypanosoma brucei</i> Lister strain 427 | 3          | 11     | 1654840 |                |
| Tb427_11_01_v4 | <i>Trypanosoma brucei</i> Lister strain 427 | 11         | 11     | 4977113 |                |
| Tb427_09_v4    | <i>Trypanosoma brucei</i> Lister strain 427 | 9          | 9      | 3058680 |                |
| Tb427_02_v4    | <i>Trypanosoma brucei</i> Lister strain 427 | 2          | 8      | 1194715 |                |
| Tb427_07_v4    | <i>Trypanosoma brucei</i> Lister strain 427 | 7          | 8      | 2206643 |                |
| Tb427_01_v4    | <i>Trypanosoma brucei</i> Lister strain 427 | 1          | 7      | 1064569 |                |
| Tb427_08_v4    | <i>Trypanosoma brucei</i> Lister strain 427 | 8          | 7      | 2482252 |                |
| Tb427_05_v4    | <i>Trypanosoma brucei</i> Lister strain 427 | 5          | 4      | 1609320 |                |
| Tb427_04_v4    | <i>Trypanosoma brucei</i> Lister strain 427 | 4          | 1      | 1591669 |                |
| Tb427_06_v4    | <i>Trypanosoma brucei</i> Lister strain 427 | 6          | 1      | 1619978 |                |

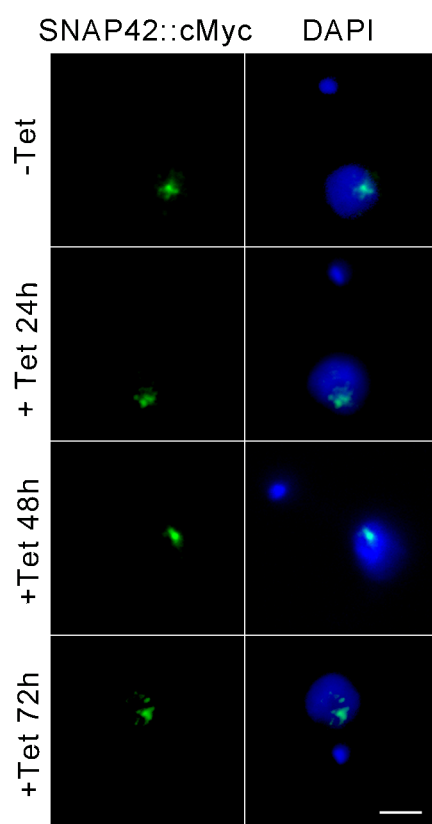



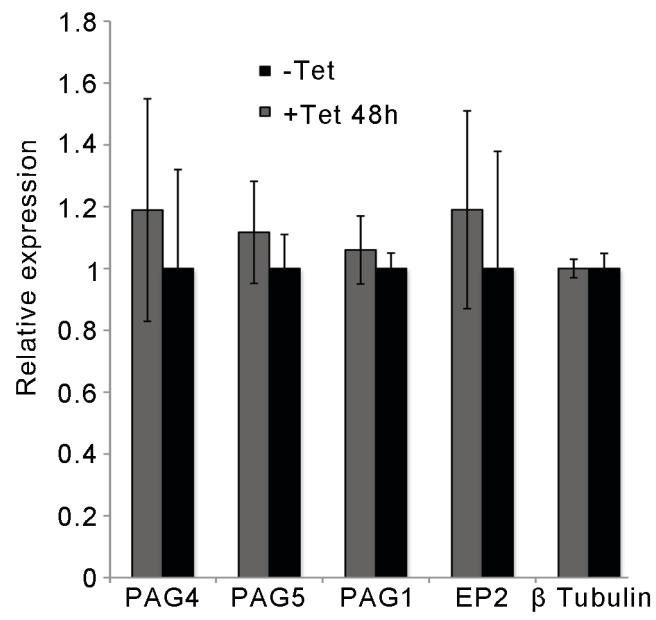

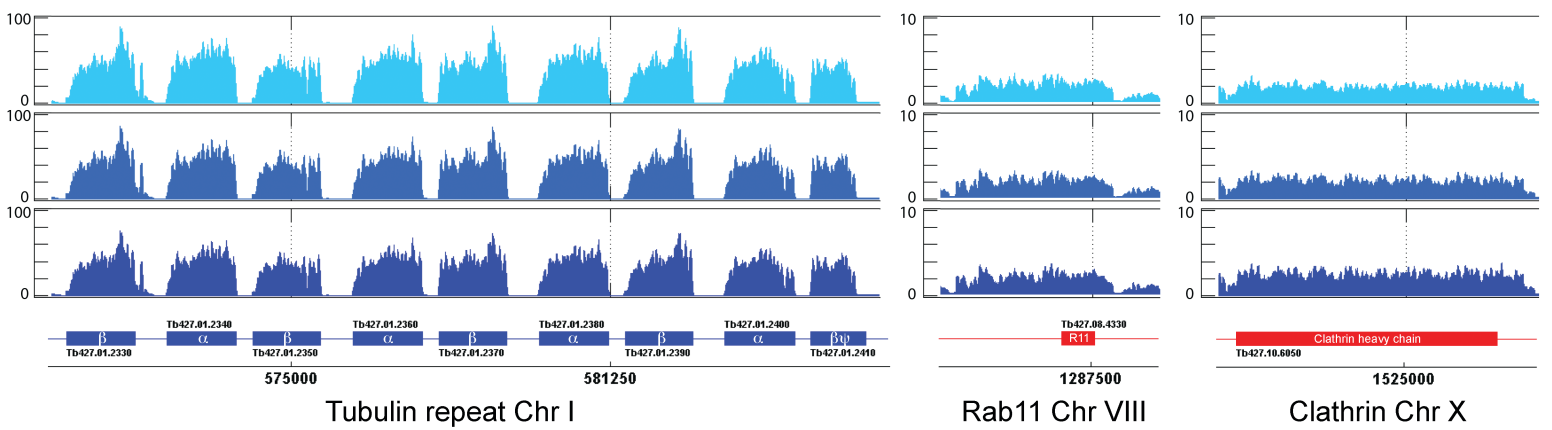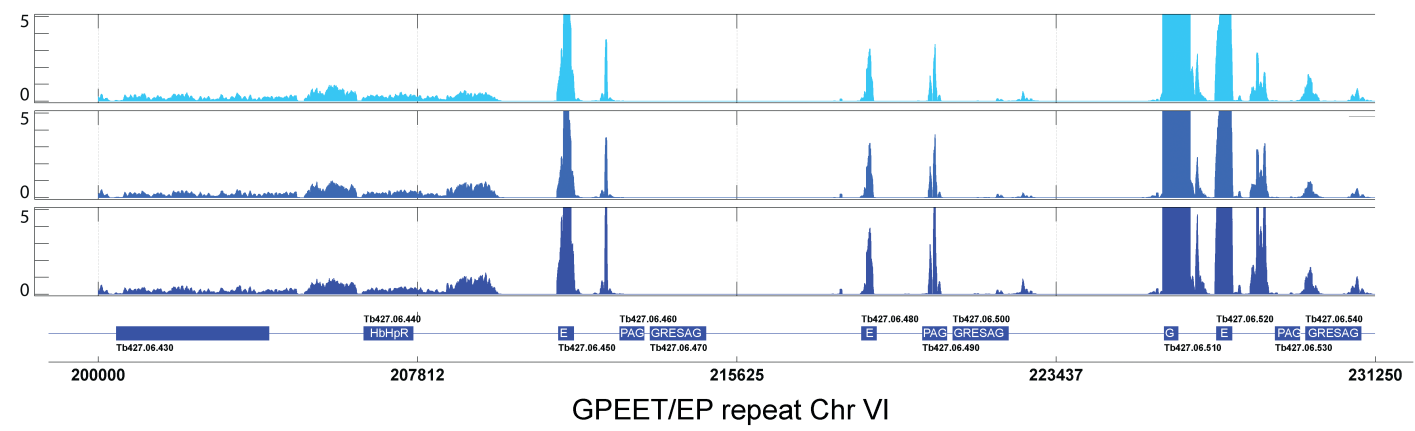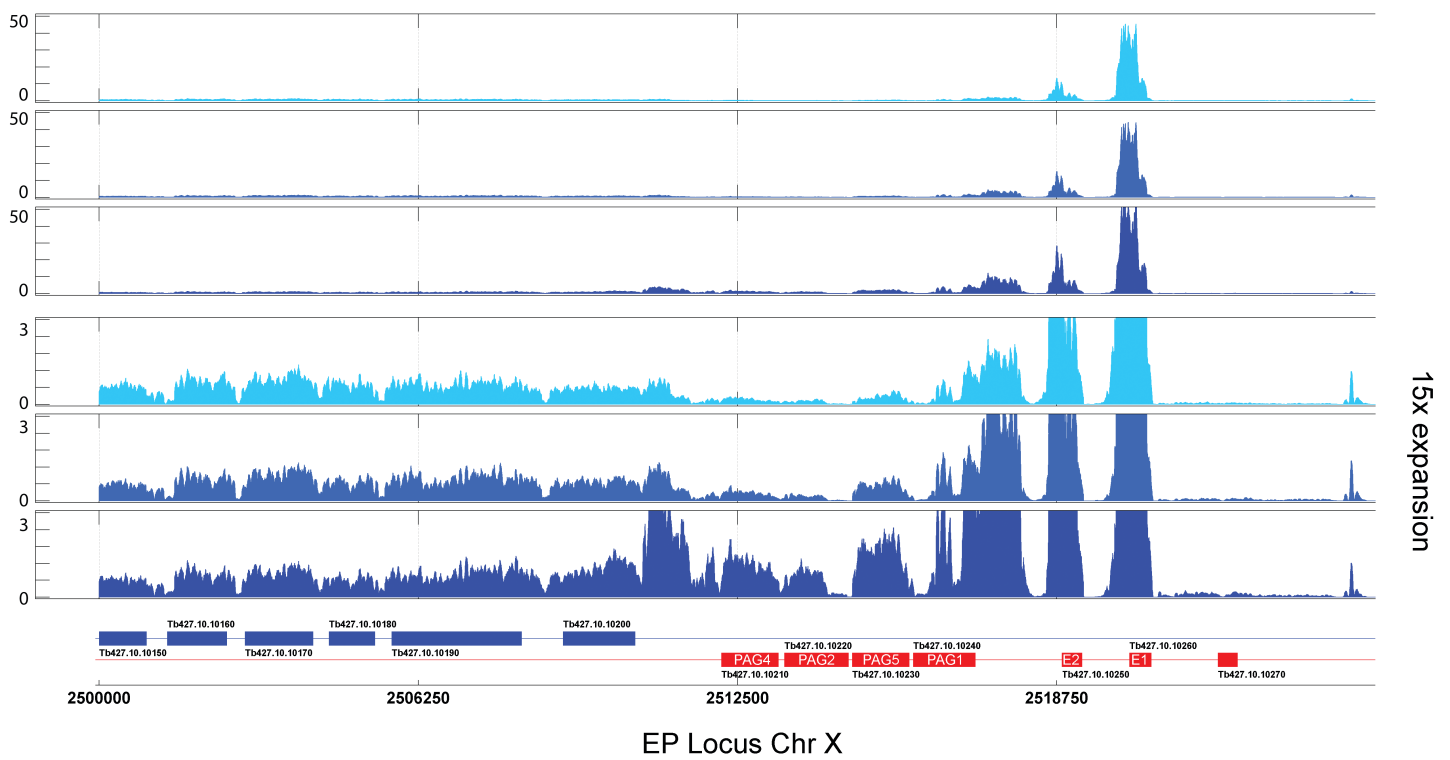

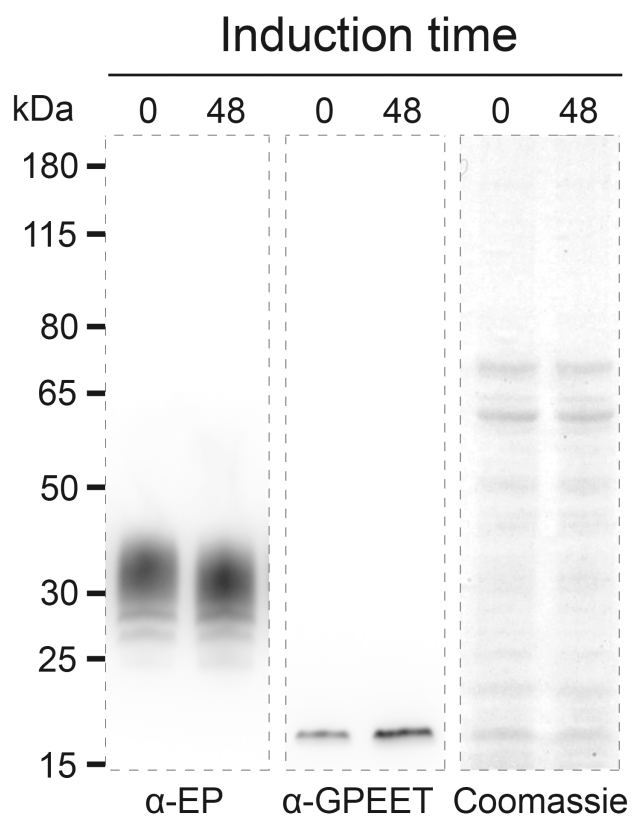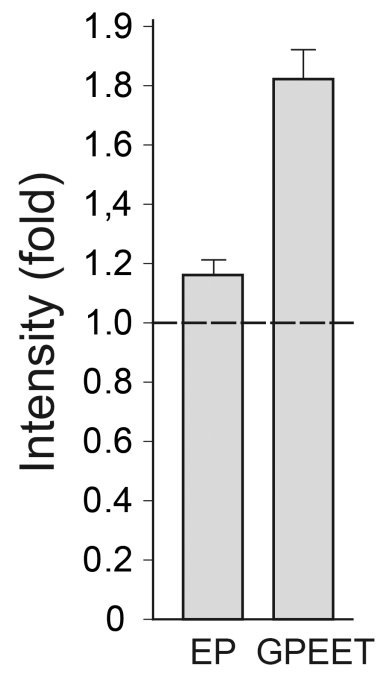

Supplement: mbc-29-1100-s001.pdf [file mbc-29-1100-s001.pdf]
